# Supplementary material for: Novel dimethylsulfoniopropionate biosynthesis enzymes in diverse marine bacteria, cyanobacteria and abundant algae
Source: Research Square preprint supplement (doi:10.21203/rs.3.rs-2678769/v1), 2023-03-17
Supplement: Supplementary file 1 [file 61e5a5c7ddae690f7c023d13.xlsx]

## Sheet: Sheet1
Supplementary Table 6. Metagenome/metatranscriptome information of methyltransferase enzyme
Project	DsyB(Copies/Transcripts per cell normalized by RecA)				MmtN(Copies/Transcripts per cell normalized by RecA)				DSYE(Copies/Transcripts per cell normalized by β-Actin)				DSYE(Copies/Transcripts per cell normalized by RecA)
OM-RGC.V2_MetaG	SRF	DCM	MES		SRF	DCM	MES		SRF	DCM	MES		SRF	DCM	MES
	0.00214666	0.0031509	0.00170588		0.000102244	0.000105201	0.000227319		0.0613124	0.0577693	0.0192907		0.00161803	0.00144861	8.66006e-05
OM-RGC.V2_MetaT	SRF	DCM	MES		SRF	DCM	MES		SRF	DCM			SRF	DCM
	0.00111595	0.00106604	0.0013676		0.000263952	0.000222134	0.00176693		0.0119	0.00314034			0.00333644	0.00155599
Project	DSYB(Copies/Transcripts per cell normalized by β-Actin)			DSYE(Copies/Transcripts per cell normalized by β-Actin)			TpMMT(Copies/Transcripts per cell normalized by β-Actin)
MATOU_MetaG	SRF	DCM		SRF	DCM		SRF	DCM
	0.00595548	0.00713574		0.00652092	0.0134869		9.82459e-05	0.000131905
MATOU_MetaT	SRF	DCM		SRF	DCM		SRF	DCM
	0.000869934	0.000477689		0.000228949	0.000112404		9.33419e-06	4.66081e-06
Supplementary Table6. Metagenome information of methyltransferase enzyme
Project	DsyB(Percentage of copies/transcripts normalized by RecA,%)				MmtN(Percentage of copies/transcripts normalized by RecA,%)				DSYE(Percentage of copies/transcripts normalized by β-Actin,%)				DSYE(Percentage of copies/transcripts normalized by RecA,%)
OM-RGC.V2_MetaG	SRF	DCM	MES		SRF	DCM	MES		SRF	DCM	MES		SRF	DCM	MES
	0.214666	0.31509	0.170588		0.0102244	0.0105201	0.0227319		6.13124	5.77693	1.92907		0.161803	0.144861	0.00866006
OM-RGC.V2_MetaT	SRF	DCM	MES		SRF	DCM	MES		SRF	DCM			SRF	DCM
	0.111595	0.106604	0.13676		0.0263952	0.0222134	0.176693		1.19	0.314034			0.333644	0.155599
Project	DSYB(Percentage of copies/transcripts normalized by β-Actin,%)			DSYE(Percentage of copies/transcripts normalized by β-Actin,%)			TpMMT(Percentage of copies/transcripts normalized by β-Actin,%)
MATOU_MetaG	SRF	DCM		SRF	DCM		SRF	DCM
	0.595548	0.713574		0.652092	1.34869		0.00982459	0.0131905
MATOU_MetaT	SRF	DCM		SRF	DCM		SRF	DCM
	0.0869934	0.0477689		0.0228949	0.0112404		0.000933419	0.000466081
