# Supplementary material for: Novel dimethylsulfoniopropionate biosynthesis enzymes in diverse marine bacteria, cyanobacteria and abundant algae
Source: Research Square preprint supplement (doi:10.21203/rs.3.rs-2678769/v1), 2023-03-17
Supplement: Supplementary file 2 [file 90be89e07a3e6d420314193e.xlsx]

## Sheet: DSYE
Table S4: Eukaryotic transcriptomes from the Marine Microbial Eukaryote Transcriptome Sequencing Project (MMETSP) containing DSYE, and if the organisms have been shown to produce DMSP (modified from Li et al., 2022)										blastP against Fragilariopsis cylindrus CCMP1102			blastP against Nitzschia inconspicua
DSYE clade	gene_ID	phylum	class	species	Copies of DSYE	Copies of DSYB	Percentage identity to DSYB	Copies of TpMMT	High,low or undetermined DMSP producer	Query coverage(%)	E-value	Per.identity(%)	Query coverage(%)	E-value	Per.identity(%)	amino acid length(aa)	aminno acid sequnence
CladeA	Bigelowiella longifila CCMP242_MMETSP1359_22057|m.30888	Chlorarachniophyta	Chlorarachniophyceae	Bigelowiella longifila CCMP242	1				High	97	4e-134	61.46	96	2e-115	52.9	304	GASEVVADHRRRGFGTTSTDSDVGTMVVEQYDSEQTRKFYQTVMGGGGNDIHFGVFKSAD EGVREAAANTTELMLDLMHWIKPVAPDAEVLDLGSGHGGATHTMVQRFGTQNLCFNIGSE QNDMNLETCATLGIGNKVSCHRGDFNLGLPEEWSQRFDYVYSCEVFCHAADKPALLAEVR RVLKPGGVLVFSDIMGADGVAEEILRPFTDRNTTTVMGRPNEYRYQIKEAALREVCYVDM SQNLEEFFGLMLKQVEENYDALLNEGLTDDYLLNWINSLSDRVKVQAEHGAFAWGVFGAV NDA*
	Bigelowiella natans CCMP1242_MMETSP1358_29136|m.40338	Chlorarachniophyta	Chlorarachniophyceae	Bigelowiella natans CCMP1242	1				High	97	3e-134	61.46	96	3e-115	52.9	297	SSSSSSSSSSSDSDVGSKVVEQYDSEQTRQFYKTVMGGGGNDIHFGVFKSADEGVREAAA NTTELMLDLMQWIKPVVPNAAQVLDLGSGHGGATHTMVQRFGTQNLCFNIGSEQNDMNLE TCAKLGIEGNVSCHRGDFNLGLPEEWSDRFDYVYSCEVLCHAADKPALLAEIRRVLKPGG VLVFSDIMGADGVSEEVLRPFTDRNTTTVMGRPSEYRYQLKEAALREVCYVDMSPNLEEF FGLMLKQVEDNYDNLLKEGLTDEYLQNWINSLSDRVNVQAEHNAFAWGVFGAVNDA*
	Bigelowiella natans CCMP1258.1_MMETSP1055_41513|m.66749	Chlorarachniophyta	Chlorarachniophyceae	Bigelowiella natans CCMP1258.1	1				High	94	7e-113	55.36	97	6e-136	60.47	292	MTMVSGLIDILSTSRASDLEHKTTMTKKKKKEEEEQEITNRHNAAGINTGEKRVKPNKRH TVTNEEKKRKEFERRGSSITHRSCAVLMGGISISALMGRNESRLVADYGRRSFTSSSSSS SDSDVGSKVVEQYDSEQTRQFYKTVMGGGGNDIHFGVFKSADEGVREAAANTTELMLDLM QWIKPVVPNAAQVLDLGSGHGGATHTMVQRFGTQNLCFNIGSEQNDMNLKTCAKLGIEGN VSCHRGDFNLGLPEEWSDRFDYVYSCEVLCHAADKPALLAEIRRVLKPGGVL
	Bigelowiella natans CCMP1259_MMETSP1054_36652|m.59415	Chlorarachniophyta	Chlorarachniophyceae	Bigelowiella natans CCMP1259	1				High	94	8e-113	56.75	97	1e-136	62.42	280	KKKKKKKKEEEEQEITNRHNAAGINTGEKRVKPNKRHTVTNEEKKRKEFERRGSSITHRS CAVLMGGISISALMGRNESRLVADYGRRSFTSSSSSSSDSDVGSKVVEQYDSEQTRQFYK TVMGGGGNDIHFGVFKSADEGVREAAANTTELMLDLMQWIKPVVPNAAQVLDLGSGHGGA THTMVQRFGTQNLCFNIGSEQNDMNLKTCAKLGIEGNVSCHRGDFNLGLPEEWSDRFDYV YSCEVLCHAADKPALLAEIRRVLKPGGVLVVALVVAVNY*
	Bigelowiella natans CCMP623_MMETSP1052_12215|m.20248	Chlorarachniophyta	Chlorarachniophyceae	Bigelowiella natans CCMP623	1				High	94	8e-113	56.75	97	1e-136	62.42	303	MTMVSGLIDILSTSRASDLEHKTTMTKKKKKEEEEQEITNRHNAAGINTGEKRVKPNKRH TVTNEEKKRKEFERRGSSITHRSCAVLMGGISISALMGRNESRLVADYGRRSFTSSSSSS SDSDVGSKVVEQYDSEQTRQFYKTVMGGGGNDIHFGVFKSADEGVREAAANTTELMLDLM QWIKPVVPNAAQVLDLGSGHGGATHTMVQRFGTQNLCFNIGSEQNDMNLKTCAKLGIEGN VSCHRGDFNLGLPEEWSDRFDYVYSCEVLCHAADKPALLAEIRRVLKPGGVLVVALVVAV NY*
	Lotharella globosa LEX01_MMETSP0041_38518|m.74734	Chlorarachniophyta	Chlorarachniophyceae	Lotharella globosa LEX01	1				Undetermined	53	3e-55	51.22	97	0	82.49	495	KVAWNFPFAGMGIVAGGVPCGELMAHQGIRNITRGVMEEVYETANRDIKHRFAARQNHGS PVLIEDNFVEKLWTMSEADSLKGYFPSTVIDYLNKSPVEKDFIFAEPLARAQELGLAVPY MTMVNEVVDILTTCNDSKTRESVQKILTDSMPMATATEATISSSASYSSSPKNTQKKKSE GLDSRKNNQKNNKKNKNAFSSGGRRQLSTVSEVGEQVVEQYDSQQTRNFYKCVMGGGGMD IHFGLFRHNTDNVRVAAENTTELMLNTMDWLKPVKPESVVLDLGSGHGGSTHKMVQRFGN TSVCFNIGEEQNEMNLTFAKDLKIDHRITCQQGDFNLGLPKDWESKFDHVYSCEVLCHAA DKPALLSEIRRVLKPGGVLVFSDIMGADGVPEE…
	Norrisiella sphaerica BC52_MMETSP0113_16486|m.23051	Chlorarachniophyta	Chlorarachniophyceae	Norrisiella sphaerica BC52	2				Undetermined	98	2e-134	60.93	96	4e-113	55.56	284	SEVGSKVVEQYDNLQTRKFYQTVMGGGGNDIHFGVFKSKNDNVREAAANTTELMLDLMHW IRPVTQHHQVLDLGSGHGGATHEMIKRFGTQNTCFNIGTEQNEMNLAYCQEIGISDHVTC HRGDFNLGLPKEWDEGFDYVYSCEVLCHAADKPALLSEVRRVLAPGGVFVFSDIMGADGV SEEILKPFTDRNTTTVMGRPSEYHYQLREAGLREVAYIDLTVNLGPFFQLMLDQVTNNYT ELVEVGLSNDYLDNWISSLTDRVKVQRDHGAFAWGVFGAVNDQN
CladeB	Chroomonas mesostigmatica_cf CCMP1168_MMETSP0047_26906|m.66305	Cryptophyta	Cryptophyceae	Chroomonas mesostigmatica_cf CCMP1168	1				Undetermined	94	2e-108	50.87	97	8e-158	68.24	347	NTRPFVDPNRPPPPVAGPPPTPTTRPIPRRTSPPLHPNSGQQGQNKMTKTTGDFTGQQFA EDAVAAKVQEQYGEAHARTFYTYVMGGGGLDIHYGIFRAKTDGVFESSKATNKALLQQMD LASPCGPDSFVLDLGSGHGGLSHDIVKTFNCKVLSFNLSPEQNQMNLDEAKKLGIADKIE VLAGDFNKGLPEEWTGKFSHVLSCEVFCHAASKPALLKEILRCLKPGGAISFTDIMGADG ADEKALKDFTDRNATTEMARPSGYRKDLVDSGFSEVSFWDGSCHLEHYFQAMLDVCVNKR EAMMKDGVPGPYLDNWVKSLTERVDIQKNKHVFSWGIFTARKPGPVF
	Bathycoccus prasinos CCMP1898_MMETSP1399_6276|m.21004	Chlorophyta	Mamiellophyceae	Bathycoccus prasinos CCMP1898	1				Low	97	8e-139	61.79	95	6e-111	54.48	302	MADFVDKQFSKEEVAEKVLEQYDEEQTRIFYTYVMGGGGNDIHFGIYRDPTDGVKESANR TTEWMMTQMDMAKEITKDMHVLDVGSGHGGGSHAMAKKFGCKVTGINIGPGQNAMNVAKA KELGLGHLIDAVVGNINEPLPEEWTGKFDAIWSCEVLCHAGDKLALFKDLYRCLKPGGVF VFSDICGADGADEKALKAFTDRNATTFMGRPSQYIEYIKDSGFTYVNWWDGSNHLERYFR DMIKQIDDNREEMKSKGITDQYLDNWHGSLSERAAIQNEKGVFAWGVFVARKPEVEGKRW T*
	Bathycoccus prasinos RCC716_MMETSP1460_2700|m.8331	Chlorophyta	Mamiellophyceae	Bathycoccus prasinos RCC716	1				Low	78	2e-139	73.33	94	2e-110	50.34	302	MADFVDKQFSKEEVAEKVLEQYDEEQTRIFYTYVMGGGGNDIHFGIYRDPTDGVKESANR TTEWMMTQMDMAKEITKDMHVLDVGSGHGGGSHAMAKKFGCKVTGINIGPGQNAMNVAKA KELGLGHLIDAVVGNINEPLPEEWTGKFDAIWSCEVLCHAGDKLALFKDLYRCLKPGGVF VFSDICGADGADEKALKAFTDRNATTFMGRPSQYIEYIKDSGFTYVNWWDGSNHLERYFR DMIKQIDDNREEMKSKGITDQYLDNWHGSLSERAAIQNEKGVFAWGVFVARKPEVEGKRW T*
	Dolichomastix tenuilepis CCMP3274_MMETSP0033_21966|m.70996	Chlorophyta	Prasinophyceae	Dolichomastix tenuilepis CCMP3274	1				Undetermined	97	2e-137	61.13	96	9e-110	52.88	292	MADFVGKQFTKDEVADKVLEQYDEEHTRIFYQCVMGGGGHDIHFGCYRDPSWGVKESSAA TTELMMSLMDWAKPVTKDSLVLDLGSGHGGGTHAMVTKFGCKAQGFNLGPKQNEMNMAEC ERLGIADRVEVMVGNLNDPFPAEWTDKFDFVWSCEVFCHAGDKAALLAEVKRILKPGGVL VFSDLMGSDGAAESDLAAFTDRNATTFMGRPSMYLDFVKGAGLEYVCWFDNSSSMERYFA DMVKQIDENRETMKSQGLTEQYINNWHQSLSDRVKIQHDKGVFAHGVFVARA
	Genus nov. species nov. RCC2288_MMETSP1326_23468|m.57492	Chlorophyta	Mamiellophyceae	Genus nov. species nov. RCC2288	1				Undetermined	94	2e-101	51.72	98	2e-164	69.41	326	QTRWARTPPRFQHTRQTHTRSTHEPINMADFVNKQFTKEEVADKVLEQYDEEQTRIFYQC VMGGGGHDIHFGIYKNPEDGVKESSAATTDWMMTQMDWANPVKAGQHVLDLGSGHGGGSH AMAQRFGCKVTGYNIGPGQNALNMERCKELGIDHLVDAEVGNINDPLPAEWTGKFDAIWS CEVLCHAGDKLALFTELMRVLKPGGVFVFSDIMGADGADEKALKGFTDRNATTFMGRPSM YIDFVKQAGFKYVTWWDGSHHLERYFRDMLSQIKNNRPEMNSKGITDPYLDNWVSSLTER ADIQRDKGVFAWGVFVARKPAVGEL*
	Mantoniella antarctica SL-175_MMETSP1106_8466|m.21082	Chlorophyta	Mamiellophyceae	Mantoniella antarctica SL-175	1				Low	89	3e-68	40.79	99	0	82.12	323	RKIAGGRTSSLTSHAPARTRDSEIMADFVDKQFTKEEVAEKVLEQYDEETTRVFYQCVMG GGGHDIHFGIYKEPTDGVKESSQHTTEWMMTQLDGASPVKPTHHVLDLGSGHGGGSHAMA QKFGCKVTGYNLGAGQNALNMARCKELGIDHLVDAQVGNINNPLPAEWTGKFDQVWSCEV LCHAGDKVALFKELVRCMKPGGVFVFSDIMGADGADEKALKGFTDRNATTFMGRPSMYID FVKEAGMKYVTWWDGSNHLERYFRDMLSQIQSNRPEMNAKGITNQYLDNWVSSLTERADI QAEKGVFAWGVFVARKPFEGEL*
	Mantoniella sp CCMP1436_MMETSP1468_34535|m.55478	Chlorophyta	Mamiellophyceae	Mantoniella sp CCMP1436	1				Low	62	3e-63	53.37	99	0	82.12	340	ARKRHLSVPPVFWDNCDRKIAGGRTSSLTSHAPARTRDSEIMADFVDKQFTKEEVAEKVL EQYDEETTRVFYQCVMGGGGHDIHFGIYKEPTDGVKESSQHTTEWMMTQLDGASPVKPTH HVLDLGSGHGGGSHAMAQKFGCKVTGYNLGAGQNALNMARCKELGIDHLVDAQVGNINNP LPAEWTGKFDQVWSCEVLCHAGDKVALFKELVRCMKPGGVFVFSDIMGADGADEKALKGF TDRNATTFMGRPSMYIDFVKEAGMKYVTWWDGSNHLERYFRDMLSQIQNNRPEMNAKGIT NQYLDNWVSSLTERADIQAEKGVFAWGVFVARKPFEGEL*
	Micromonas pusilla CCAC1681_MMETSP1401_529|m.2165	Chlorophyta	Prasinophyceae	Micromonas pusilla CCAC1681	1				High or low	86	2e-100	51.32	97	0	87.88	329	RAVAVDTPECASRTRLPPFDPPDHRSNRTVTMADFVDKQFTKEEVADKVLEQYDEEITRV FYQCVMGGGGHDIHFGIYKNPEDGVKESSAYTTEWMMTQMDWAKTIKPDMHVLDLGSGHG GGSHAMAQRFGCKVTGYNLGPGQNALNMERCKELGIDHLVDAQVGNINNPLPEEWTGKFD AVWSCEVLCHAGDKVALFKELVRCLKPGGVFVFSDIMGADGADEKALKGFTDRNATTFMG RPSMYIDFIKESGFKYVTWWDGSNHLERYFRNMLSQIAENRPEMNAKGISDQYLDNWVSS LTERADIQKEKGVFAWGVFVARKPAEGEL
	Micromonas pusilla CCMP1723_MMETSP1403_10894|m.45355	Chlorophyta	Prasinophyceae	Micromonas pusilla CCMP1723	1				High or low	53	2e-55	51.22	97	0	82.21	330	AAPRPWKSTKGRDHFSAARTVTQLVRSTKTIMADFVDKQFSKDEVADKVLEQYDDETTRV FYQCVMGGGGHDIHFGIYKSPTDGVKESSDYTTEWMMTQMEWAKPIDANCHILDLGSGHG GGSHAMAKRWGCKVTGYNLGPGQNALNMARCVELGIDHLVEARVGNINDPLPAEWTGKFD AVWSCEVLCHAGDKVALFKELVRCLKPGGVFVFSDIMGADGADETALRAFTDRNATTFMG RPSMYVDFIKESGFKYVTWWDGSHHLERYFRGMLHQITTNRKEMNAKGVSDEYLNNWVSS LTDRADVQKAKGVFAWGVFVARKPEVGELV
	Micromonas pusilla CCMP494_MMETSP1404_5412|m.20322	Chlorophyta	Prasinophyceae	Micromonas pusilla CCMP494	1				High or low	69	1e-86	55.4	86	0	87.45	317	SYCSRTATQHVRSTQTIMADFVDKQFSKDEVADKVLEQYDDETTRVFYQCVMGGGGHDIH FGIYKSPTDGVKESSDYTTEWMMTQMEWAKPIDPNCHVLDLGSGHGGGSHAMAKRWGCKV TGYNLGPGQNALNMARCVELGIDHLVEARVGNINDPLPAEWTGKFDAVWSCEVLCHAGDK VALFKELSRCLKPGGVFVFSDIMGADGADEKALKAFTDRNATTFMGRPSMYVDFIKESGF KYVTWWDGSHHLERYFRGMLHQINTNRKEMNAKGVSDEYLNNWVTSLTDRADVQKAKGVF AWGVFVARKPEVGELI*
	Micromonas pusilla RCC2306_MMETSP1327_2049|m.7083	Chlorophyta	Prasinophyceae	Micromonas pusilla RCC1614	1				High or low	97	4e-137	61.54	97	9e-113	51.84	298	MADFVDQQFTKEEVASKVLEQYDEQITRSFYQCVMGGGGHDIHFGIYKNETDGVKESSQH TTEWMMAQMEWAKTITPGMHVLDLGSGHGGGSHAMAQKFGCKVTGYNLGPGQNSLNMERC AELGISHLVDAQVGNINNPLPQEWTNKFDAVWSCEVLCHAGDKVSLFKELVRCLKPGGVF VFSDIMGADGADEAALKGFTDRNATTFMGRPSMYIDFVKEAGFKYVTWWDGSNHLERYFR NMLSQIANNRTEMNAKGISDQYLDNWVSSLTERADIQQEKGVFAWGVFVARKPGQGEL
	Micromonas sp. CCMP1646_MMETSP1080_5448|m.22052	Chlorophyta	Prasinophyceae	Micromonas sp. CCMP1646	1				High or low	90	3e-104	51.08	97	5e-165	69.87	330	RAVAVDTPECASRTRLPPFDPPDHRSNRTVTMADFVDKQFSKEEVADKVLEQYDEEITRV FYQCVMGGGGHDIHFGIYKNPEDGVKESSAYTTEWMMTQMDWAKTITPDMHVLDLGSGHG GGSHAMAQRFGCKVTGYNLGPGQNALNMERCKELGIDHLVDAQVGNINNPLPEEWTGKFD AVWSCEVLCHAGDKVALFKELVRCLKPGGVFVFSDIMGADGADEKALKGFTDRNATTFMG RPSMYIDFIKESGFKYVTWWDGSNHLERYFRNMLSQIAENRPEMNAKGISDQYLDNWVSS LTERADIQKEKGVFAWGVFVARKPAEGEL*
	Micromonas sp. CCMP2099_MMETSP0802_9903|m.36801	Chlorophyta	Prasinophyceae	Micromonas sp. CCMP2099	1				High or low	98	1e-135	59.93	96	6e-112	54.88	299	MADFVDQQFTKEEVASKVLEQYDEQITRSFYQCVMGGGGHDIHFGIYKNETDGVKESSQH TTEWMMAQMEWAKTITPGMHVLDLGSGHGGGSHAMAQKFGCKVTGYNLGPGQNSLNMERC AELGISHLVDAQVGNINNPLPQEWTNKFDAVWSCEVLCHAGDKVSLFKELVRCLKPGGVF VFSDIMGADGADEAALKGFTDRNATTFMGRPSMYIDFVKEAGFKYVTWWDGSNHLERYFR NMLSQIANNRTEMNAKGISDQYLDNWVSSLTERADIQQEKGVFAWGVFVARKPGEGEL*
	Micromonas sp. NEPCC29_MMETSP1082_5046|m.22466	Chlorophyta	Prasinophyceae	Micromonas sp. NEPCC29	1				High or low	98	1e-135	59.93	95	7e-110	54.14	300	MADFVDKQFTKDEVAEKVLEQYDDETTRVFYKCVMGGGGHDIHFGIYKSPTDGVKESSDY TTEWMMTQMEWAKPIDANCHVLDLGSGHGGGSHAMAKRWGCKVTGYNLGPGQNALNMERC AEIGVDHLVDAKVGNINDPLPAEWTGKFDAVWSCEVLCHAGDKVALFKELMRCLKPGGVF VFSDIMGADGADEKALKAFTDRNATTFMGRPSMYIDFVKESGFKYVTWWDGSHHLERYFR DMLHQINTNRKEMNAAGVSDGYLDNWVSSLTDRANVQKEKGVFAWGVFVARKPEVGELA*
	Micromonas sp. RCC451_MMETSP1400_9904|m.43149	Chlorophyta	Prasinophyceae	Micromonas sp. RCC451	1				High or low	90	3e-74	43.68	100	0	82.52	317	PWPPPPVTQLLRITQTIMADFVDKQFSKDEVADKVLEQYDDETTRVFYQCVMGGGGHDIH FGIYKSPTDGVKESSDYTTEWMMTQMEWAKPIDANCHILDLGSGHGGGSHAMAKRWGCKV TGYNLGPGQNALNMARCVELGIDHLVEARVGNINDPLPAEWTGKFDAVWSCEVLCHAGDK VALFKELVRCLKPGGVFVFSDIMGADGADEKALKAFTDRNATTFMGRPSMYVDFIKESGF KYVTWWDGSHHLERYFRGMLHQIATNRKEMNAKGVSDEYLNNWVSSLTDRADVQKAKGVF AWGVFVARKPEVGELV*
	Micromonas sp. RCC472_MMETSP1084_4216|m.17374	Chlorophyta	Prasinophyceae	Micromonas sp. RCC472	2				High or low	96	7e-136	60.2	95	7e-110	54.14	313	RTATQLVRSTQTIMADFVDKQFSKDEVADKVLEQYDDETTRVFYQCVMGGGGHDIHFGIY KSPTDGVKESSDYTTEWMMTQMEWAKPIDPNCHVLDLGSGHGGGSHAMAKRWGCKVTGYN LGPGQNALNMARCVELGIDHLVEARVGNINDPLPAEWTGKFDAVWSCEVLCHAGDKVALF KELSRCLKPGGVFVFSDIMGADGADEKALKAFTDRNATTFMGRPSMYVDFIKESGFKYVT WWDGSHHLERYFRGMLHQIATNRKEMNAKGVSDEYLNNWVTSLTDRADVQKAKGVFAWGV FVARKPEVGELI*
	Ostreococcus lucimarinus clade-A-BCC118000_MMETSP0939_6123|m.24344	Chlorophyta	Prasinophyceae	Ostreococcus lucimarinus clade-A-BCC118000	1				Low*	60	1e-86	63.3	86	0	87.45	315	PDEITPRRARSRPRRRTRIMADFVGKQFDKEEVGKMVLEQYDEAEQRLFYTIVMGGGGDD IHFGIYRDAKDGVRESSAATTAWMMTQLDMARPIGAGDKLLDIGSGHGGGSHALAKKYGC SVMGYNIGPGQNAQNIAKAKELGLGDLVDAVVGDINKPFPADWTNSFDGAWSCEVLCHAG DKPELFKEVARVLKPGAAFVFSDIMGADGADEKTLKGFTDRNATTVMGRPSTYLQCVKDA GLDYVTWWDGSNHLETYFRDMIKQIHTHREEMLSKGLTDKYLDNWLESLTERADTQRDHG VFAWGVFVCRKPLN*
	Ostreococcus mediterraneus clade-D-RCC1107_MMETSP0938_4531|m.14820	Chlorophyta	Prasinophyceae	Ostreococcus mediterraneus clade-D-RCC1107	1				Low*	98	7e-135	60.93	97	7e-113	54.15	313	PRRPDHAFTFTRAKNTHIMADFVGKQFDKDTVGAKVLEQYDEAEQRLFYTIVMGGGGDDI HFGIYRNEGDGVRESGANTTEWMMTQLDMGRPIQKGDRLLDIGSGHGGGSHALAKRFGCN VLGYNIGPGQNAHNLARAKELGLENQVDAMVGDINKPFPAEWTNTFDGAWSCEVLCHAGD KPELFKEIYRCLKPGACLVFSDIMGADGADEATLKGFTDRNATTVMGRPSSYLKCIKDAG LEYVTWWDGSVHLETYFRDMINQINTHREEMLSKGLSEQYLDNWLSSLTERADTQRDHGV FAWGVFVCRKPAA*
	Ostreococcus mediterraneus clade-D-RCC2572_MMETSP0929_6796|m.24750	Chlorophyta	Prasinophyceae	Ostreococcus mediterraneus clade-D-RCC2572	1				Low*	61	4e-44	41.8	99	0	82.12	320	PTKSAMTPRRPDHAFTFTRAKNTHIMADFVGKQFDKDTVGAKVLEQYDEAEQRLFYTIVM GGGGDDIHFGIYRNEGDGVRESGANTTEWMMTQLDMGRPIQKGDRLLDIGSGHGGGSHAL AKRFGCNVLGYNIGPGQNAHNLARAKELGLENQVDAMVGDINKPFPAEWTNTFDGAWSCE VLCHAGDKPELFKEIYRCLKPGACLVFSDIMGADDADEATLKGFTDRNATTVMGRPSSYL KCIKDAGLEYVTWWDGSVHLETYFRDMINQINTHREEMLSKGLSEQYLDNWLSSLTERAD TQRDHGVFAWGVFVCRKPAA
	Ostreococcus mediterraneus clade-D-RCC2573_MMETSP0936_4718|m.15751	Chlorophyta	Prasinophyceae	Ostreococcus mediterraneus clade-D-RCC2573	1				Low*	98	2e-135	59.93	95	5e-113	51.03	310	PDHAFTFTRAKNTHIMADFVGKQFDKDTVGAKVLEQYDEAEQRLFYTIVMGGGGDDIHFG IYRNEGDGVRESGANTTEWMMTQLDMGRPIQKGDRLLDIGSGHGGGSHALAKRFGCNVLG YNIGPGQNAHNLARAKELGLENQVDAMVGDINKPFPAEWTNTFDGAWSCEVLCHAGDKPE LFKEIYRCLKPGACLVFSDIMGADGADEATLKGFTDRNATTVMGRPSSYLKCIKDAGLEY VTWWDGSVHLETYFRDMINQINTHREEMLSKGLSEQYLDNWLSSLTERADTQRDHGVFAW GVFVCRKPAA
	Ostreococcus prasinos BCC99000_MMETSP0933_5616|m.17802	Chlorophyta	Prasinophyceae	Ostreococcus prasinos BCC99000	1				Low*	97	1e-138	61.79	94	1e-111	54.67	301	MADFVDKQFTKEEVASKVLEQYDEEQTRIFYTYVMGGGGNDIHFGIYRDPTDGVKESANR TTEWMMTQLDMAKEITKDMHVLDVGSGHGGGSHAMAKKFGCKVTGINIGPGQNAMNLAKA KELKLDHLVDAVVGNINDPLPEEWTGKFDAIWSCEVLCHAGDKLALFKDLYRCLKPGGAF VFSDICGADGADEKALKAFTDRNATTFMGRPSQYIQDVKDSGFTYVNWWDGSNHLERYFR DMVKQIDDNREEMKSKGITDQYLDNWHGSLTERAAIQNEKGVFAWGVFVARKPEVEGKRW T
	Pyramimonas parkeae CCMP726_MMETSP0820_8389|m.21389	Chlorophyta	Prasinophyceae	Pyramimonas parkeae CCMP726	3				Undetermined	100	2e-128	56.63	97	2e-129	58.86	396	RTPKRAVACFACTSFTKQQNMADFVGKQFSKDEVAEHVLEQYDQEHTRIFYQCVMGGGGH DIHFGLFKNPATDGVYESSKHTTDFMCHSMDWAAPVTKDSRVLDLGSGHGGGTHAMVTKF GCSVDCFNLGPEQNAMNMEECKKLGIADRVTTHVGNLNNPLPAEWTNRFDFVWSCEVFCH AGDKVALLKEINRVLKPGGVLVFSDLMGADHAKEDQLRSFTDRNSTTVMGRPKNYLEAIK ESGLNYMMWWDGSHHLEQYFRCMVSQIDKNYDEMKKQGLTDQYLKNWHQSLSDRAETQKL TGVFAWGVFLARKGGSPPLPSFDPTTLEGVKELNDYLADKTYITGTQASKDDLTVFCTMS AQPNESLYPHAARWFKHITGLTSSSFPGTCLGV…
	Tetraselmis astigmatica CCMP880_MMETSP0807_4296|m.27365	Chlorophyta	Prasinophyceae	Tetraselmis astigmatica CCMP880	2				High or low	83	1e-97	51.56	98	4e-164	69.41	327	WRRRREQQRWRGPERTVTGAASLVAHDSMSAAPAQFDGKQFSKDEVSEKVVEQYDDKLTR IFYQCVMGGGGHDIHFGIYRDENYGVKEAAAATTEFMLLNMDWAKKVRPTDRVLDLGSGH GGGTHAIVQRFGCHVSGINLGPQQNEMNLERCKELGIADKVDVRVGNINDGLPKEWESSF DYVFSCEVLCHAAVKEDVFKEIYRVLKPGGVLVFTDIMGSDDASEKALRPFTDRNATTYM GRPSKYIQAMKGAGLTHLCFWDQSEHLETFFRGMYKQTVDNKEAMLNAGLTEKYLQSWEK SLSERAEIQNKESVFAWGVFVAKKMA*
	Tetraselmis chuii PLY429_MMETSP0491_33856|m.60493	Chlorophyta	Prasinophyceae	Tetraselmis chuii PLY429	1				High or low	98	2e-135	59.93	94	8e-110	50.69	296	MADFVDKQFAKEEVADKVLEQYDQEHTRIFYKYVMGGGGHDIHFGVFKDPSWGVKESGEA TTNIMLDFLNWAGSISADAHLLDLGSGHGGGTHAMAQRFGCKVTGINIGPEQNKVNMDRC KELGIAEKVNAVVGNINEKLPFEDNTFDSCFSCEVLCHAGDKVFTIKEVKRCLKPGGVFV FSDLMGADDADEKALRSFTDRNATTIMGRPSQYLQAIKDAGMQYVTWWDNSNHLEKYFRE MLRQISVHREDMKKEGVTDAYLDNWVQSLSERAEVQASKGVFSHGFFVCRKA
	Tetraselmis striata LANL1001_MMETSP0803_2078|m.7237	Chlorophyta	Prasinophyceae	Tetraselmis striata LANL1001	3				High or low	54	3e-57	51.19	100	0	83.77	345	KSLACRAAATSTAFILLHLLAVREAYSTTPLSSSFYRSLAFIFREHENMADFVDKQFSKE EVAGKVLEQYDEEHAQVYYRYVMGGGGYDIHFGVYRDPSWGVKESANATTELMMTLMDWA KPCTKDSTVLDLGSGHGGGSHAIVQRFGCEVIGFNLGPGQNSVNLRRCEELGIQGKVSCV VGNLNEPLPADWTEKFDFVWSCEVFCHAADKVEVLKEIKRVLKPGGVFVMSDIMGADSAS EKELKDFTDRNATSQMARPSQYIKDLEAAGLHYVTYWDNSNNMQRYFADMLSQTVKHRDD MIKDGVPAQYIENWRQSLTDRVAIQKERNVFAHGVFVARK
Clade C	Aureococcus anophagefferens CCMP1850_MMETSP0915_18514|m.60002	Ochrophyta	Pelagophyceae	Aureococcus anophagefferens CCMP1850	3	1	~52%		Low*	98	3e-113	51.16	100	1e-135	60.59	199	LALPDCRSTLKASPSTNQNRQTMSAAVQKTTGDFKNKQFSEEEVASKVVEQYDEVHARTF YKYVMGGGGYDIHYGMFRTASDGVFESSKNTNAALLRLLDQTRPVTKDSVVLDLGSGHGG LSHEIATTFGCKVVSFNISPEQNNMNLEEAARLGVKELISVVEGNFNDAATFPPKKLPKI THIVSCEVFCHAASKPALL
	Chrysocystis fragilis CCMP3189_MMETSP1165_6571|m.19986	Ochrophyta	Pelagophyceae	Chrysocystis fragilis CCMP3189	1				High*	97	9e-141	61.54	91	3e-109	54.48	309	MSKMVSEKDTGDFKGKQFSEEEVAAKVIEQYSEEHARTFYTYVMGGGGYDIHYGIFKKPS DGVYESSKATNAAVIETLDRTRGITPESVVLDLGSGHGGLSHEIALKFGCTVHSFNISPE QNEMNLAEASRLGIAEKIRVTAGNFNDKSFPAPELKGTFTHVVSCEVFCHAASKPDLLGH ILDLLVPGGALVFTDIMGADGADEKALKDFTDRNATTEMARPSGYLDQLQTAGFVHRGFW DGSCHLEHYFKAMLAVCQTKGDEMVAAGVPRPYLDKWIAALTDRVDIESTKHVFAWGIFS ARKPGPVF*
	Chrysoreinhardia sp CCMP2950_MMETSP1164_17152|m.68985	Ochrophyta	Pelagophyceae	Chrysoreinhardia sp CCMP2950	1				High*	97	9e-114	54.97	97	1e-129	59.33	203	QQRTDVMAAVAESAEEKKNTGDFKGKQFSEEEVAAKVVEQYSEEHARTFYKHVMGGGGYD IHYGIFRSATDGVFESSKATNRAVMETMDRTRPLTADSVVLDLGSGHGGLSHELALKYGC KVLSFNISPEQNAMNLEEAKRLGVDALIDVRAGNFNTADFPPADLAGHFTHVVSCEVFCH AASKPTLLAAISAMLVAGGALVF
	Chrysoreinhardia sp. CCMP3193_MMETSP1166_24125|m.77819	Ochrophyta	Pelagophyceae	Chrysoreinhardia sp CCMP3193	1				High*	97	3e-141	61.2	95	1e-109	53.9	310	MSAQTETTTTGDFKGKQFAEAEVADKVLEQYSEEHARTFYRYVMGGGGYDIHYGIFKKAS DGVFESSKATNAAVMETMDRTKALTPESKVLDLGSGHGGLSHELAKTYGCQVVSFNISPE QNRMNEEEAQKLGVGDLIRVVEGNFNVAFPPKEQLGVGEFTHVVSCEVFCHAASKPDLLQ GISDLLAPGGALVFTDIMGADGADEKALKDFTDRNATTEMARPSGYTQQLKDANFVHVSF WDGSYNLEFYFKAMLDVCLTQGDAMIEDGVPKPYLQKWIDALTDRVKIESEKHVFAWGIF SARKPGPVF*
	Genus nov. species nov. RCC1024_MMETSP1329_22676|m.68050	Ochrophyta	Pelagophyceae	Genus nov. species nov. RCC1024	1				Undetermined	96	2e-144	64.45	96	5e-109	52.56	307	MAADEKTTGDFAGKQFSEKEVASKVVEQYDEAHARTFYKYVMGGGGYDIHYGMFRQATDG VFESSKNTNAALLRLLDQTRPVTKDSVVVDLGSGHGGLSHEIAKTFGCKVISFNISPEQN RMNLEEAARLGVGHLISVRCGDFNDAAAFPPADLGRVTHVISCEVFCHAASKPTLLADVM KILAPGGALVFTDIMGAEGADEKALKDFTDRNATTEMARPSGYLEWLRAAGFCHLGFFDG SGHLLPYFAAMLAVCTTQGEAMVKDGVPRPYLDKWVGSLTDRVKIQEEKGVFAWGLFSAR KPGPLY*
	Pelagococcus subviridis CCMP1429_MMETSP0882_30218|m.93541	Ochrophyta	Pelagophyceae	Pelagococcus subviridis CCMP1429	5	3	~51%		High*	97	3e-141	61.2	96	5e-109	54.73	307	MAANTPKTTGDFKGKQFSEEAVAAKVVEQYDEAHARTFYKYVMGGGGYDIHYGMFRAEGD GVFESSKHTNAALLRLLDQTRPVTKDSVVVDLGSGHGGLSHEIAKTFGCKVISFNISPEQ NQMNLAEAKKLGVGDLITVREGNFNDKASFPPTDLGKVTHVISCEVFCHAASKPTLLKDV LSILEPGGALVFTDIMGADGADEKALKDFTDRNATTEMARPSGYLDWLKAAGFCHTGFFD GSGHLLPYFAAMLAVCHKQGKEMVADGVPQPYLDKWIASLTDRVEIQKTKAVFAWGLFSA RKPGPLY
	Pelagomonas calceolata CCMP1756_MMETSP0889_418|m.1117	Ochrophyta	Pelagophyceae	Pelagomonas calceolata CCMP1756	1				Low	94	9e-109	50.87	97	4e-144	61.95	375	ATCAASRQKSRLHSIQRLQDVRDALHLQRLQHHTNCTQSPQHLQHTISTASTALPDSSTS HHRETSKMAAQTPQTTGDFTNKQFSEQEVANKVIEQYSEAHARTFYKYVMGGGGYDIHYG MFRTATDGVFESSKNTNAALLRLLDQTRPVTKDSVVLDLGSGHGGLSHEIAQTFGCKVIS FNISPEQNQMNLDEAKRLGVGELISVRCGDFNDRANFPPSDLGEVTHVISCEVFCHAASK PNLLADVRKIVQPGAALVFTDIMGADGADEKALKDFTDRNATTAMARPSQYLDWLKAAGF CHVGFFDGSGHLLPYFSAMLDVCHKQGAAMVKDGVPQPYLDKWVASLTDRVAIQKDKAVF AWGLFSARAPGPLY*
	Pelagomonas calceolata RCC969_MMETSP1328_24927|m.64734	Ochrophyta	Pelagophyceae	Pelagomonas calceolata RCC969	1				Low	96	9e-145	64.45	95	1e-108	53.1	308	MAAQTPQTTGDFTNKQFSEQEVANKVIEQYSEAHARTFYKYVMGGGGYDIHYGMFRTAAD GVFESSKNTNAALLRLLDQTRPVTKESVVLDLGSGHGGLSHEIAQTFGCKVISFNISPEQ NQMNLDEAKRLGVGELISVRCGDFNDRANFPPSDLGEVTHVISCEVFCHAASKPNLLADV RKIVQPGAALVFTDIMGADGADEKALKDFTDRNATTAMARPSQYLDWLKAAGFCHVGFFD GSGHLLPYFSAMLDVCHKQGAAMVKDGVPQPYLDKWVASLTDRVAIQKDKAVFAWGLFSA RAPGPLY*
	non described CCMP2097_MMETSP0974_4495|m.16636			non described non described CCMP2097	4				Undetermined	94	3e-108	53.1	97	4e-145	64.03	328	EVRVALRYFRVPCFRALSGTMSANVDKQTGDFKGKQFSEEEVANKVIEQYSEAHARTFYK YVMGGGGYDIHYGIFRKATDGVFESSKQTNAALLQTMDRTRPLNKDSVVLDLGAGHGGLS HEIAKEFGCKVHSFNISPEQNAMNVEEAARLGIGHLITVAAGDFNKADFPPKELAGKFTH VVSCEVFCHAASKHKLLTAVHQMLVPGGALVFTDIMGADGADEKALKDFTDRNATTTMAR PAGYMDILRAAGFAHVGFWDGSGHLVHYFAQMLKVCTTQDKEMIADGVPAPYLANWVASL TDRVDIQRAHAVFAWGIFAARKPGPMF*
	non described CCMP2293_MMETSP0988_27837|m.63661			non described non described CCMP2293	2				Undetermined	94	8e-110	54.67	100	2e-142	59.87	315	ATHQSINNMSGETGDFTGKQFSEQEVADKVKEQYGEAHARIFYKYVMGGGGLDIHYGIYR APTDGVFESSKATNKKLLQSLDWMAPVTKDSLVLDLGSGHGGISHDLVSTFGCKVVGLNI SPEQNGMNKDEAIKLGFGDRVEVLVGDFNEGLPKDWDNKFTHIVSCEVFCHAASKPALLK ECLRVLKPGGGFAFTDIMGADGADEKALKDFTDRNATTEMARPKGYQQLLRDAGFSEVSF WDGSCHLVHYFASMLKVCMPSAQGGNKEDMIKEGVPEGYLNNWVSSLTERVEIQRSKGVF AWGIFSARKLGPVC*
	Undescribed CCMP2135_MMETSP1467_28082|m.86072			Undescribed CCMP2135	1				Undetermined	92	1e-104	49.65	97	7e-163	68.69	319	SPTPTSLRKMAAQQETTGDFADKQFSEAEVADKVLEQYSEEHARTFYKYVMGGGGYDIHY GIFKKPSDGVYESSKATNAAIMETMDRTKALTPESYVLDLGSGHGGLSHELAKKYGCSVV SFNISPEQNAMNEAEAKALGVGDLITVVEGNFNVDFPPKAYADAEKKFTHVVSCEVFCHA ASKPALLSGIYDMLAPGGVLVFTDIMGADGADEKALKDFTDRNATTEMARPSGYRAQLAD ANFAHVSFWDGSYNLEFYFKAMLEVCTSKGDDMVSEGVPRPYLEKWIAALTDRVKIESEK HVFAWGIFSARKPGPVFP*
CladeD	Exanthemachrysis gayraliae RCC1523_MMETSP1464_12967|m.43959	Haptophyta	Haptophyceae	Exanthemachrysis gayraliae RCC1523	1				Low	95	6e-110	53.77	98	2e-140	60.33	338	RWCMLSTWRVHSGFRNSLPRVASQLSPSAPFRPFLRATMSTGDFKGKQFKETEVADKVVE QYDLAHARIFYKYVMGGGGMDIHYGAFRSASDGVFESSKETNKRLLTTLDWMRPITEKSL VLDLGSGHGGLSHELIKTYGCKVIGVNISPEQNKMNEEEAKRLGVGDKNEVVLANFNDGL PADWTGKFTHVVSCEVFCHAASKPGLLADLKRCLAPGGALAFTDIMGADGANEKALKDFT DRNATTEMARPSNYRQMLKDVGYREVSFLDMSAHLVLYFDNMVKQINTHKADMMKEGVSE EYLAKWLDSLTQRVDIQREHEVFAWGVFACRTDGPLF*
	Pavlova sp. CCMP459_MMETSP1381_18054|m.44509	Haptophyta	Pavlovophyceae	Pavlova sp. CCMP459	3				High	96	3e-160	69.1	90	4e-103	50.36	309	HAHAAMSTGDFKDKQFAEEEVADKVVEQYDLAHARVFYKYVMGGGGMDIHYGVFKSPTDG VYESSKETNKRLMQALDWMQPITKDSVVLDVGSGHGGLSHELIQNYGCKVVGINISPEQN KMNEDEATKLGVGDRNEVLLMNFNDGLPSAFDNKFTHVISCEVLCHAASKPKLLEDIKRV MKPGGAFAFTDIMGADGANEKALKDFTDRNATTEMARPSGYRTLLTDGGFRDVSFCDFSA HLGTYFQSMVDQINKHREDMKKEGVTDAYLDKWMDSLTQRVDIQTKEEVFAWGIFMCRKA GPIYGLKA*
	non described CCMP 2436_MMETSP0985_5677|m.14892			non described non described CCMP2436	1				Undetermined	96	4e-160	69.1	95	5e-105	52.58	301	MSTGDFQGKQFAEREVAAKVLEQYDIAHARVFYRYVMGGGGLDIHYGVFRCAEDGVYAAS KETNSRLLTALDWMAPIGGGSAVLDLGSGHGGLSHALLQRFEGTRVLGANISPAQNEMNV SEARVLGVGGRMEVQQLDFNNGLPAEWAQRFSHVISCEVLCHAASKPALLGELHRALKPG GGLAFTDIMGADGADEKALKDFTDRNATTKMARPSEYRQILKAAGFVDVSFVDLSTHLLL YFENMVSQIHEHRAEMEAEGVPAGYLEAWLTSLTQRVDIQRSHAVFAWGIFMCRKPGPLF *
CladeE	Attheya septentrionalis CCMP2084_MMETSP1449_6678|m.12029	Bacillariophyta	Coscinodiscophyceae	Attheya septentrionalis CCMP2084	1				Undetermined	97	1e-155	67.79	94	1e-107	53.98	302	MADFVDKQFTKEEVASKVLEQYDEEQTRIFYTYVMGGGGNDIHFGIYRDPTDGVKESANR TTEWMMTQLDMAKEITKDMHVLDVGSGHGGGSHAMAKKFGCKVTGINIGPGQNAMNLAKA KELKLDHLVDAVVGNINDPLPEEWTGKFDAIWSCEVLCHAGDKLALFKDLYRCLKPGGAF VFSDICGADGADEKALKAFTDRNATTFMGRPSQYIQDVKDSGFTYVNWWDGSNHLERYFR DMVKQIDDNREEMKSKGITDQYLDNWHGSLTERAAIQNEKGVFAWGVFVARKPEVEGKRW T*
	Licmophora paradoxa CCMP2313_MMETSP1360_0|m.1	Bacillariophyta	Bacillariophyceae	Licmophora paradoxa CCMP2313	1	1	~42%		Undetermined	96	9e-145	64.45	94	9e-108	53.98	241	SKETNQRLLTCLDWARPVTKDSVVLDLGSGHGGISHELAVRFGCKVIGVNISPEQNKMNL EEAEKLGVKELVNVVLCNFNEGLPAEWTDKFTHIVSCEVLCHAANKTQLFAELQRVMVPG APFSFTDIMGADGADEKVLKDFTDRNATTKMARPSEYADILKDSGFKQVSFIDFSPHLVH YFQSMVDQINKHSDDMKSEGVSQAYLDKWMESLTSRVDIQREHSVFAWGIFTCRLEGPIF *
	Picocystis salinarum CCMP1897_MMETSP1159_8769|m.31117	Bacillariophyta	Coscinodiscophyceae	Picocystis salinarum CCMP1897	1				Undetermined	85	4e-99	51.72	97	7e-163	68.69	317	RGPERTVTGAASLVAHDSMSAAPAQFDGKQFSKDEVSEKVVEQYDDKLTRIFYQCVMGGG GHDIHFGIYRDENYGVKEAAAATTEFMLLNMDWAKKVRPTDRVLDLGSGHGGGTHAIVQR FGCHVSGINLGPQQNEMNLERCKELGIADKVDVRVGNINDGLPKEWESSFDYVFSCEVLC HAAVKEDVFKEIYRVLKPGGVLVFTDIMGSDDASEKALRPFTDRNATTYMGRPSKYIQAM KGAGLTHLCFWDQSEHLETFFRGMYKQTVDNKEAMLNAGLTEKYLQSWEKSLSERAEIQN KESVFAWGVFVAKKMA*
	Proboscia alata PI-D3_MMETSP0176_37215|m.43294	Bacillariophyta	Coscinodiscophyceae	Proboscia alata PI-D3	2				Undetermined	94	5e-111	54.48	97	5e-137	60.74	333	IININGTLFFHNQVRGFTITMTTAAVKGDFKDTQFSQVEVADKVVEQYDDEQARVFYKYV MGGGGLDIHYGAYCKSTDTVYESSKETNDRLLSVLNWTRPITSDSLVLDVGSGHGGLSHE CALRFGCQVHGINISPQQNKMNLDEAKKLGLNVDGESPKVLCDLLNFNNGLPTEWTGKFT HILSCEVLCHAANKPELLKELTRVLKPGGAFCFTDIMGSDGADEKVLKDFTDRNATTKMA RPSEYSALLKEAGFQQISFNDFSPHLVHYFQGMVDQIEKHRGDMLSEGVDSAYLDKWMTS LTSRVDIQKNHEVFAWGIFSCRLKGPIF
	Proboscia inermis CCAP1064/1_MMETSP0816_15257|m.15441	Bacillariophyta	Coscinodiscophyceae	Proboscia inermis CCAP1064/1	1				Undetermined	96	2e-167	71.28	83	6e-100	52.73	295	MADFVNKQFAKEEVADKVVEQYDQEHTRVFYKYVMGGGGHDIHFGLFKESAWGVRESSEA TTSIMLDLMNWGTTIGKDSHVLDLGSGHGGGSHALAQRYGCRVTGINIGPEQNKVNMEQC KKLGIDDKVTAVVGNINDKLPFEDNTFDACFSCEVLCHAGDKAFTLTEVARCLKPGGVIV FSDLMGADDADEAALRSFTDRNATTVMGRPSQYLAALKQSGLKYLCWWDNSEHLEKYFRE MLRQISVHREDMKKEGVTDEYLDNWVKSLTDRADIQASKGVFSHGFFVARK
	Pseudonitzschia australis 10249 10 AB_MMETSP0851_116293|m.237882	Bacillariophyta	Bacillariophyceae	Pseudo-nitzschia australis 10249 10 AB	4				Low	98	0	81.06	62	2e-88	64.77	355	RVKPNKRHTVTNEEKKRKEFERRGSSITHRSCAVLMGGISISALMGRNESRLVADYGRRS FTSSSSSSSSDSDVGSKVVEQYDSEQTRQFYKTVMGGGGNDIHFGVFKSADEGVREAAAN TTELMLDLMQWIKPVVPNAAQVLDLGSGHGGATHTMVQRFGTQNLCFNIGSEQNDMNLKT CAKLGIEGNVSCHRGDFNLGLPEEWSDRFDYVYSCEVLCHAADKPALLAEIRRVLKPGGV LVFSDIMGADGVSEEVLRPFTDRNTTTVMGRPSEYRYQLKEAALREVCYVDMSPNLEEFF GLMLKQVEDNYDNLLKEGLTDEYLQNWINSLSDRVNVQAEHNAFAWGVFGAVNDA
	Pseudonitzschia delicatissima B596_MMETSP0327_18635|m.46257	Bacillariophyta	Bacillariophyceae	Pseudo-nitzschia delicatissima B596	2				Low	85	6e-178	84.79	61	2e-89	64.4	264	LDPPGFDIHYGIFRKPTDTVYEASKATNDRLLTCLDWTHPVTKDSYVLDLGSGHGGISHE IAGRFGCKVMGANISPEQNKMNLEEAEKEGVGGLVDVTLCNFNDGLPEEWTSKFTHIVSC EVLCHAADKATLFQELKRVLKPGGAFIFTDIMGADGADEKILKDFTDRNATSKMARPSEY FDLLSEAGLSEGSFLNFSPHLVHYFQSMVDQITNHKAAMLEEGCSEAYLAKWMESLTSRV AIQRDHKVFAWGIFTARLEGDVY*
	Pseudonitzschia delicatissima UNC1205_MMETSP1432_6095|m.12552	Bacillariophyta	Bacillariophyceae	Pseudo-nitzschia delicatissima UNC1205	1	1	~46%		Low	97	0	84.28	53	1e-55	50.61	309	MSPLSSTNVDSKGDFKDQQFAENEVADKVVEQYDEKHARVFYKYVMGGGGFDIHYGIFRK PTDTVYEASKATNDRLLTCLDWTHPVTKDSYVLDLGSGHGGISHEIASRFGCKVMGANIS PEQNKMNLEEAEKEGVGDLVDVTLCNFNDGLPEEWTSKFTHIVSCEVLCHAADKAALFQQ LKRVLKPGGAFIFTDIMGADGADEKILKDFTDRNATSKMARPSEYFDLLREAGLSEGSFL NFSPHLVHYFQSMVDQITTHKAAMLEEGCSEAYLAKWMESLTSRVAIQRDHKVFAWGIFT ARLEGDVY*
	Pseudonitzschia fraudulenta WWA7_MMETSP0853_2848|m.6170	Bacillariophyta	Bacillariophyceae	Pseudo-nitzschia fraudulenta WWA7	3	5	~40%		Low	98	0	81.06	69	4e-88	56.54	264	MGGGGFDIHYGIFRKASDTVYEASKATNDRLLTSLDWTRPVTKDSVVLDLGSGHGGISHE IAERFGCKVMGANISPEQNNMNLEEAKKLGVGELVDVTLCNFNDGLPEDWTDKFTHVVSC EVLCHAADKPALFLELKRVLKPGGAFVFTDIMGADGADEKILKDFTDRNATTKMARPSEY FSLLTGAGLSEPSFLNFSPHLVHYFQSMVDQINKHGAAMIEEGCSEEYLAKWMESLTSRV DIQRDHKVFAWGIFTARVEGDVY*
	Pseudonitzschia pungens cf. cingulata_MMETSP1060_9463|m.28224	Bacillariophyta	Bacillariophyceae	Pseudo-nitzschia pungens cf. cingulata	1				Low	99	0	81.52	57	1e-82	65.54	307	MAALAHQTETKGDFQDQQFEESEVADKVVEQYDEKHARVFYKYVMGGGGFDIHYGIFRTP SDTVYEASKATNERLLTCLDWTQPVTKDSVVLDLGSGHGGISHEIAGRFGCKVMGANISP EQNKMNKEEAEKLGVGDLVDVTLCNFNEGLPFADNSFTHIISCEVLCHAADKSTLFEELK RVLKPGGAFVFTDIMGADGADEKILKDFTDRNATTKMARPSEYFTLVTDAGLSDPSFLNF SPHLAHYFQSMVDQIVKHKDAMLDEGCSEQYLAKWMESLTSRVSIQKEHKVFAWGIFTAR LEGDIY*
	Pseudonitzschia pungens cf. pungens_MMETSP1061_16886|m.38712	Bacillariophyta	Bacillariophyceae	Pseudo-nitzschia pungens cf. pungens	1				Low	95	3e-111	53.9	97	5e-137	61.74	342	VVFLASWSSLTALHQCSTQTERKTTTKKNRKEYPTMAALAHQTETKGDFQDQQFEESEVA DKVVEQYDEKHARVFYKYVMGGGGFDIHYGIFRTPSDTVYEASKATNERLLTCLDWTQPV TKDSVVLDLGSGHGGISHEIAGRFGCKVMGANISPEQNNMNMEEAEKLGVGDLVDVTLCN FNEGLPFADNSFTHIISCEVLCHAADKSTLFEELKRVLKPGGAFVFTDIMGADGADEKIL KDFTDRNATTKMARPSEYFTLVTDAGLSEPSFLNFSPHLAHYFQSMVDQIVKHKDAMLDE GCSEQYLAKWMESLTSRVSIQKEHKVFAWGIFTARLEGDIY*
	Synedropsis recta cf CCMP1620_MMETSP1176_19970|m.33153	Bacillariophyta	Bacillariophyceae	Synedropsis recta cf CCMP1620	2				Undetermined	85	6e-178	84.79	85	1e-99	51.53	302	MTDTGDFEDKQFAETEVADKVVEQYDELQARIFYKYVMGGGGLDIHYGAFTKETDTVYES SKETNKRLLTVLDWTRPLTADSVVLDLGSGHGGLSHECATRFPGVTVVGANISPEQNKMN LAEAAKLGVGDQISVVLANFNNGLPAEWTNKFTHILSCEVLCHAANKPELFNELTRVLQP GGAFVFTDIMGSDGADEKVLKDFTDRNATTKMARPSEYSGLLKDASFQEISYNDFSPHLV YYFQSMVDQVVKHKQDMMDEGVAEAYLDKWMASLTNRVEMQRDHKVFAWGIFSCRVDGPI F*
	Thalassionema nitzschioides L26-B_MMETSP0158_17457|m.26423	Bacillariophyta	Fragilariophyceae	Thalassionema nitzschioides L26-B	1				Undetermined	84	1e-171	82.63	90	4e-102	50	307	MSTAANAVCEGDFKDRQFSEAEVSRKVVEQYDGKQARVFYKYVMGGGGMDIHYGCFRSEK DSVFEASKATNDRLMCCLDWAFPMSKTSYVLDLGSGHGGLSHEIAKRFGCKVMGINISPE QNKMNMDEANKEGVGELVDVTLGDINSGLPTEWTNTFTHVVSCEVLCHAADKSALFKELK RVLKPGGAFVFTDIMGADGADEVALKAFTDRNATSKMARPSEYLQLLEDNDFKHCSYLDF SQHLLCYYRSMLNQIKKNYDAMVSEGCSEEYLAKWTDTLEDRVEMQREKSVFAWGFFSSR IDGPLY*
	Coscinodiscus wailesii CCMP2513_MMETSP1066_19108|m.23682	Bacillariophyta	Coscinodiscophyceae	Coscinodiscus wailesii CCMP2513	1				Low	99	0	81.97	53	2e-55	50.61	306	MSPGDDGAKGDFKDKQFEQSEVADKVVEQYDEEHARVFYKYVMGGGGFDIHYGIFRKPSD TVYEASKATNDRLLTCLDWTFPVTKESYVLDLGSGHGGISHEIAKRFGCKVMGANISPEQ NKMNLEEAEKLGVGELVDVTLTNFNDGLPEDWTDTFTHVISCEVLCHAASKPDLFQELKR VLKPGGAFVFTDIMGADGANEKVLKDFTDRNATTKMARPSEYLSLITEAGFGEASFMNFS PHLVHYFQSMVDQINTHKSAMLDEGCSEQYLSKWMDSLTSRVETQREHNVFAWGIFTARY PGDIY*
High: Species from genera reported to produce ≥50 mM intracellular DMSP
Low: Species from genera producing <50 mM DMSP
High or low: Species from genera reported to contain both high and low DMSP producers
Detected: DMSP production detected but not quantified
Undetermined: None representative species from this genus have been tested for DMSP production
*：data from this study

## Sheet: DSYB and TpMMT
Table S4: Eukaryotic transcriptomes from the Marine Microbial Eukaryote Transcriptome Sequencing Project (MMETSP) and European Nucleotide Archive (ENA) containing DSYB or TpMMT, and if the organisms have been shown to produce DMSP (modified from Li et al., 2022)
MMETSP or ENA ID	Phylum	Class	Species	Copies of DSYB	Copies of TpMMT	Percentage identity to TpMMT	DMSP production
MMETSP0017	Bacillariophyta	Bacillariophyceae	Cylindrotheca closterium KMMCC_B 181	0	1	0.71	High or low
MMETSP1360	Bacillariophyta	Bacillariophyceae	Licmophora paradoxa CCMP2313	1	0		Undetermined
MMETSP0745	Bacillariophyta	Bacillariophyceae	Nitzschia punctata CCMP561	1	0		High or low
MMETSP1432	Bacillariophyta	Bacillariophyceae	Pseudo-nitzschia delicatissima UNC1205	1	0		Low
MMETSP0850	Bacillariophyta	Bacillariophyceae	Pseudo-nitzschia fradulenta WWA7	5	0		Low
MMETSP1058	Bacillariophyta	Coscinodiscophyceae	Detonula confervacea CCMP353	0	1	0.73	Undetermined
MMETSP0699	Bacillariophyta	Coscinodiscophyceae	Extubocellulus spinifer CCMP396	0	1	0.74	Undetermined
MMETSP0563	Bacillariophyta	Coscinodiscophyceae	Skeletonema dohrnii SkelB	1	1	0.73	High or low
MMETSP0578	Bacillariophyta	Coscinodiscophyceae	Skeletonema grethea CCMP1804	0	1	0.7	High or low
MMETSP0593	Bacillariophyta	Coscinodiscophyceae	Skeletonema japonicum CCMP2506	1	1	0.7	High or low
MMETSP1040	Bacillariophyta	Coscinodiscophyceae	Skeletonema marinoi FE60	2	0		High or low
MMETSP1039	Bacillariophyta	Coscinodiscophyceae	Skeletonema marinoi FE7	1	1	0.7	High or low
MMETSP0920	Bacillariophyta	Coscinodiscophyceae	Skeletonema marinoi SkelA	1	0		High or low
MMETSP1428	Bacillariophyta	Coscinodiscophyceae	Skeletonema marinoi UNC1201	1	1	0.7	High or low
MMETSP0603	Bacillariophyta	Coscinodiscophyceae	Skeletonema menzelii CCMP793	0	1	0.72	High or low
MMETSP0013	Bacillariophyta	Coscinodiscophyceae	Skeletonema costatum 1716	0	1	0.73	High or low
MMETSP0902	Bacillariophyta	Coscinodiscophyceae	Thalassiosira antarctica CCMP982	1	0		Low
MMETSP0494	Bacillariophyta	Coscinodiscophyceae	Thalassiosira gravida GMp14c1	0	1	0.76	Low
MMETSP0737	Bacillariophyta	Coscinodiscophyceae	Thalassiosira miniscula CCMP1093	1	1	0.78	Low
MMETSP0971	Bacillariophyta	Coscinodiscophyceae	Thalassiosira oceanica CCMP1005†	0	1	0.76	Low
ASM14940v2	Bacillariophyta	Coscinodiscophyceae	Thalassiosira pseudonana CCMP1335†*	0	1	1	Low
MMETSP1067	Bacillariophyta	Coscinodiscophyceae	Thalassiosira punctigera Tpunct2005C2	1	1	0.81	Low
MMETSP0403	Bacillariophyta	Coscinodiscophyceae	Thalassiosira rotula CCMP3096	0	1	0.77	Low
MMETSP0910	Bacillariophyta	Coscinodiscophyceae	Thalassiosira rotula GSO102	0	1	0.77	Low
MMETSP1071	Bacillariophyta	Coscinodiscophyceae	Thalassiosira sp NH16	3	1	0.84	Low
MMETSP0467	Ciliophora	Litostomatea	Mesodinium pulex SPMC105	1	0		Undetermined
MMETSP0126	Ciliophora	Spirotrichea	Strombidinopsis acuminatum SPMC142	2	0		Undetermined
MMETSP1436	Dinophyta	Dinophyceae	Alexandrium andersonii CCMP2222	1	0		High
MMETSP0790	Dinophyta	Dinophyceae	Alexandrium catenella OF101	3	0		High
MMETSP0661	Dinophyta	Dinophyceae	Alexandrium margalefi AMGDE01CS 322	2	0		High
MMETSP0096	Dinophyta	Dinophyceae	Alexandrium monilatum CCMP3105	12	0		High
MMETSP0378	Dinophyta	Dinophyceae	Alexandrium temarense CCMP1771	2	0		High
MMETSP0399	Dinophyta	Dinophyceae	Amphidinium carterae CCMP1314	1	0		High
MMETSP0689	Dinophyta	Dinophyceae	Amphidinium massartii CS259	1	0		High
MMETSP1036	Dinophyta	Dinophyceae	Azadinium spinosum 3D9	3	0		Undetermined
MMETSP1075	Dinophyta	Dinophyceae	Ceratium fusus PA161109	2	0		Low
MMETSP0325	Dinophyta	Dinophyceae	Crypthecodinium cohnii Seligo	5	0		High
MMETSP0117	Dinophyta	Dinophyceae	Durinskia baltica CSIRO_CS 38	3	0		Undetermined
MMETSP0766	Dinophyta	Dinophyceae	Gambierdiscus australes CAWD149	1	0		Low
MMETSP0119	Dinophyta	Dinophyceae	Glenodinium foliaceum CCAP1116_3	3	0		Undetermined
MMETSP1439	Dinophyta	Dinophyceae	Gonyaulax spinifera CCMP409	3	0		Low
MMETSP0784	Dinophyta	Dinophyceae	Gymnodinium catenatum GC744	1	0		High or low
MMETSP1441	Dinophyta	Dinophyceae	Heterocapsa arctica CCMP445	2	0		High
MMETSP0503	Dinophyta	Dinophyceae	Heterocapsa rotundata SCCAP_K 0483	1	0		High
MMETSP0448	Dinophyta	Dinophyceae	Heterocapsa triquetra CCMP448	1	0		High
MMETSP0027	Dinophyta	Dinophyceae	Karenia brevis CCMP2229	4	0		Detected
MMETSP0573	Dinophyta	Dinophyceae	Karenia brevis SP1	8	0		Detected
MMETSP0528	Dinophyta	Dinophyceae	Karenia brevis SP3	7	0		Detected
MMETSP1311	Dinophyta	Dinophyceae	Karenia brevis Wilson	5	0		Detected
MMETSP1016	Dinophyta	Dinophyceae	Karlodinium micrum CCMP2283	2	0		Undetermined
MMETSP0121	Dinophyta	Dinophyceae	Kryptoperidinium foliaceum CCMP1326	7	0		Undetermined
MMETSP1034	Dinophyta	Dinophyceae	Lingulodinium polyedra CCMP1738	6	0		Undetermined
MMETSP0253	Dinophyta	Dinophyceae	Noctiluca scintillans	1	0		Undetermined
MMETSP1338	Dinophyta	Dinophyceae	Pelagodinium beii RCC1491	3	0		High
MMETSP0370	Dinophyta	Dinophyceae	Peridinium aciculiferum PAER_2	3	0		Undetermined
MMETSP0227	Dinophyta	Dinophyceae	Polarella glacialis CCMP1383	3	0		Undetermined
MMETSP1440	Dinophyta	Dinophyceae	Polarella glacialis CCMP2088	1	0		Undetermined
MMETSP0053	Dinophyta	Dinophyceae	Prorocentrum minimum CCMP1329	2	0		High
MMETSP0269	Dinophyta	Dinophyceae	Prorocentrum minimum CCMP2233	3	0		High
MMETSP0228	Dinophyta	Dinophyceae	Protoceratium reticulatum CCCM535(CCMP1889)	4	0		Undetermined
MMETSP0796	Dinophyta	Dinophyceae	Pyrodinium bahamense pbaha01	1	0		Undetermined
MMETSP0361	Dinophyta	Dinophyceae	Scrippsiella hangoei SHTV5	3	0		High
MMETSP0368	Dinophyta	Dinophyceae	Scrippsiella hangoei SHHI_4	3	0		High
MMETSP0272	Dinophyta	Dinophyceae	Scrippsiella trochoidea CCMP3099	5	0		High
MMETSP0132	Dinophyta	Dinophyceae	Symbiodinium kawagutii CCMP2468	1	0		High
MMETSP1369	Dinophyta	Dinophyceae	Symbiodinium sp C1	2	0		High
MMETSP1370	Dinophyta	Dinophyceae	Symbiodinium sp C15	1	0		High
MMETSP1117	Dinophyta	Dinophyceae	Symbiodinium sp CCMP2430	2	0		High
MMETSP1110	Dinophyta	Dinophyceae	Symbiodinium sp CCMP421	5	0		High
MMETSP1122	Dinophyta	Dinophyceae	Symbiodinium sp Mp	2	0		High
MMETSP0224	Dinophyta	Dinophyceae	Togula jolla CCCM725	5	0		Undetermined
MMETSP1333	Haptophyta	Coccolithophyceae	Scyphosphaera apsteinii RCC1455	1	0		Undetermined
MMETSP1334	Haptophyta	Prymnesiophyceae	Calcidiscus leptoporus RCC1130	1	0		High
MMETSP1094	Haptophyta	Prymnesiophyceae	Chrysochromulina brevifilum UTEX_LB985	1	0		High or low
MMETSP1096	Haptophyta	Prymnesiophyceae	Chrysochromulina ericina CCMP281	1	0		High or low
MMETSP0146	Haptophyta	Prymnesiophyceae	Chrysochromulina polylepis CCMP1757	1	0		High or low
MMETSP0286	Haptophyta	Prymnesiophyceae	Chrysochromulina polylepis UIO037	1	0		High or low
MMETSP0287	Haptophyta	Prymnesiophyceae	Chrysochromulina rotalis UIO044	1	0		High or low
MMETSP0164	Haptophyta	Prymnesiophyceae	Coccolithus pelagicus sp braarudi PLY182g	1	0		High
MMETSP1009	Haptophyta	Prymnesiophyceae	Emiliania huxleyi 374	1	0		High
MMETSP0994	Haptophyta	Prymnesiophyceae	Emiliania huxleyi 379	1	0		High
MMETSP1155	Haptophyta	Prymnesiophyceae	Emiliania huxleyi CCMP370	2	0		High
MMETSP1153	Haptophyta	Prymnesiophyceae	Emiliania huxleyi PLYM219	1	0		High
MMETSP1366	Haptophyta	Prymnesiophyceae	Gephyrocapsa oceanica RCC1303	1	0		High
MMETSP1474	Haptophyta	Prymnesiophyceae	Imantonia sp RCC918	1	0		High
MMETSP0944	Haptophyta	Prymnesiophyceae	Isochrysis galbana CCMP1323	2	0		High
MMETSP1388	Haptophyta	Prymnesiophyceae	Isochrysis sp CCMP1244	1	0		High
MMETSP1131	Haptophyta	Prymnesiophyceae	Isochrysis sp CCMP1324	1	0		High
MMETSP1100	Haptophyta	Prymnesiophyceae	Phaeocystis antarctica	1	0		High
MMETSP1444	Haptophyta	Prymnesiophyceae	Phaeocystis antarctica CCMP1374	1	0		High
MMETSP1137	Haptophyta	Prymnesiophyceae	Pleurochrysis carterae CCMP645	1	0		High
MMETSP1083	Haptophyta	Prymnesiophyceae	Prymnesium parvum Texoma1	2	0		High
MMETSP1174	Ochrophyta	Dictyochophyceae	Dictyocha speculum CCMP1381	1	0		Undetermined
MMETSP1344	Ochrophyta	Dictyochophyceae	Florenciella parvula CCMP2471	1	0		Undetermined
MMETSP1068	Ochrophyta	Dictyochophyceae	Pseudopedinella elastica CCMP716	1	0		Undetermined
MMETSP0917	Ochrophyta	Pelagophyceae	Aureococcus anophagefferens CCMP1850	1	0		Undetermined
MMETSP0885	Ochrophyta	Pelagophyceae	Pelagococcus subviridis CCMP1429	1	0		Low
MMETSP0797	Ochrophyta	Synurophyceae	Dinophysis acuminata DAEP01	4	0		Undetermined
DMSP production for each genus as described by McParland and Levine 2019
High: Species from genera reported to produce ≥50 mM intracellular DMSP
Low: Species from genera producing <50 mM DMSP
High or low: Species from genera reported to contain both high and low DMSP producers
Detected: DMSP production detected but not quantified
Undetermined: None representative species from this genus have been tested for DMSP production
*:data from ENA

## Sheet: no DSYE_DSYB_TpMMT
Table S4: Species in Eukaryotic transcriptomes from the Marine Microbial Eukaryote Transcriptome Sequencing Project (MMETSP) doesn't containing DSYB or TpMMT, and if the organisms have been shown to produce DMSP (modified from Li et al., 2022)
MMETSP ID	Phylum	Class	species	High,low or undetermined DMSP producer
MMETSP0437	Tubulinea	unknown	Sexangularia sp. ATCC50979	Undetermined
MMETSP1104	Stramenopiles	Bigyra	Cafeteria sp. Caron Lab Isolate	Undetermined
MMETSP0942	Stramenopiles	Bigyra	Cafeteria roenbergensis E4-10	Undetermined
MMETSP0115	Stramenopiles	unknown	Bicosoecid sp ms1	Undetermined
MMETSP0198	Stramenopiles	Bigyra	Thraustochytrium sp. LLF1b	High or low
MMETSP0962	Stramenopiles	Bigyra	Schizochytrium aggregatum ATCC28209	High or low
MMETSP0958	Stramenopiles	Bigyra	Aurantiochytrium limacinum ATCCMYA-1381	Undetermined
MMETSP1347	Stramenopiles	Bigyra	Aplanochytrium stocchinoi GSBS06	Undetermined
MMETSP0957	Stramenopiles	Bigyra	Aplanochytrium sp PBS07	Undetermined
MMETSP0105	Stramenopiles	Choanoflagellata	Acanthoeca-like sp. 10tr	Undetermined
MMETSP1172	Rhodophyta	Bangiophyceae	Timspurckia oligopyrenoides CCMP3278	Undetermined
MMETSP0315	Rhodophyta	Stylonematophyceae	Rhodosorus marinus UTEX LB 2760	Low
MMETSP0011	Rhodophyta	Stylonematophyceae	Rhodosorus marinus CCMP 769	Low
MMETSP0167	Rhodophyta	Rhodellophyceae	Rhodella maculata CCMP736	Undetermined
MMETSP0313	Rhodophyta	Bangiophyceae	Porphyridium aerugineum SAG 1380-2	Undetermined
MMETSP1450	Rhodophyta	unknown	Madagascaria erythrocladiodes CCMP3234	Undetermined
MMETSP1354	Rhodophyta	Bangiophyceae	Erythrolobus madagascarensis CCMP3276	Undetermined
MMETSP1353	Rhodophyta	Bangiophyceae	Erythrolobus australicus CCMP3124	Undetermined
MMETSP0312	Rhodophyta	Compsopogonophyceae	Compsopogon coeruleus SAG 36.94	Undetermined
MMETSP0922C	Perkinsozoa	Perkinsea	Perkinsus marinus ATCC 50439	Undetermined
MMETSP0924C	Perkinsozoa	Perkinsea	Perkinsus chesapeaki ATCC PRA-65 (combined sample which includes MMETSP0924 and MMETSP0925)	Undetermined
MMETSP0945	Ochrophyta	Xanthophyceae	Vaucheria litorea CCMP2940	Undetermined
MMETSP1452	Ochrophyta	Synchromophyceae	Synchroma pusillum CCMP3072	Undetermined
MMETSP1098	Ochrophyta	Chrysophyceae	Spumella elongata CCAP 955/1	Undetermined
MMETSP1170	Ochrophyta	Pelagophyceae	Sarcinochrysis sp CCMP770	Undetermined
MMETSP1173	Ochrophyta	Dictyochophyceae	Rhizochromulina marina cf CCMP1243	High
MMETSP0102	Ochrophyta	Dictyochophyceae	Pteridomonas danica PT	Undetermined
MMETSP1160	Ochrophyta	Dictyochophyceae	Pinguiococcus pyrenoidosus CCMP2078	Undetermined
MMETSP1163	Ochrophyta	Pinguiophyceae	Phaeomonas parva CCMP2877	Undetermined
MMETSP1107	Ochrophyta	Chrysophyceae	Paraphysomonas vestita GFlagA	Undetermined
MMETSP0103	Ochrophyta	Chrysophyceae	Paraphysomonas imperforata PA2	Undetermined
MMETSP1103	Ochrophyta	Chrysophyceae	Paraphysomonas bandaiensis Caron Lab Isolate	Undetermined
MMETSP0004	Ochrophyta	Synurophyceae	Ochromonas sp. CCMP1393	High
MMETSP1105	Ochrophyta	Raphidophyceae	Ochromonas sp. BG-1	High
MMETSP1177	Ochrophyta	Raphidophyceae	Ochromonas sp CCMP1899	High
MMETSP1167	Ochrophyta	Raphidophyceae	Mallomonas Sp CCMP3275	Undetermined
MMETSP0416	Ochrophyta	Dictyochophyceae	Heterosigma akashiwo NB	Undetermined
MMETSP0410	Ochrophyta	Dictyochophyceae	Heterosigma akashiwo CCMP3107	Undetermined
MMETSP0296	Ochrophyta	Dictyochophyceae	Heterosigma akashiwo CCMP2393	Undetermined
MMETSP0894	Ochrophyta	Raphidophyceae	Heterosigma akashiwo CCMP 452	Undetermined
MMETSP1324	Ochrophyta	Synurophyceae	Florenciella sp. RCC1587	Undetermined
MMETSP1323	Ochrophyta	Bacillariophyceae	Florenciella parvula RCC1693	Undetermined
MMETSP1339	Ochrophyta	Chrysophyceae	Fibrocapsa japonica CCMP1661	Undetermined
MMETSP0812	Ochrophyta	Raphidophyceae	Dinobryon sp. UTEXLB2267	Undetermined
MMETSP1442	Ochrophyta	Bolidophyceae	Craspedostauros australis CCMP3328	Undetermined
MMETSP1095	Ochrophyta	Bolidophyceae	Chromulina nebulosa UTEXLB2642	Undetermined
MMETSP0950	Ochrophyta	Bolidophyceae	Chattonella subsalsa CCMP2191	Undetermined
MMETSP1320	Ochrophyta	Bolidophyceae	Bolidomonas sp. RCC2347	Undetermined
MMETSP1321	Ochrophyta	Bolidophyceae	Bolidomonas sp. RCC1657	Undetermined
MMETSP1319	Ochrophyta	Bolidophyceae	Bolidomonas pacifica RCC208	Undetermined
MMETSP0785	Ochrophyta	Bolidophyceae	Bolidomonas pacifica CCMP 1866	Undetermined
MMETSP0893	Ochrophyta	Prymnesiophyceae	Aureoumbra lagunensis CCMP1510	Undetermined
MMETSP0759	Heterolobosea	Prymnesiophyceae	Percolomonas cosmopolitus WS	Undetermined
MMETSP0758	Heterolobosea	Glaucophyceae	Percolomonas cosmopolitus AE-1 (ATCC 50343)	Undetermined
MMETSP1465	Haptophyta	Glaucocystophyceae	Phaeocystis cordata RCC1383	Undetermined
MMETSP1335	Haptophyta	unknown	Chrysoculter rhomboideus RCC1486	Undetermined
MMETSP0308	Glaucophyta	Globothalamea	Gloeochaete witrockiana SAG 46.84	Undetermined
MMETSP1086	Glaucophyta	Globothalamea	Cyanoptyche gloeocystis SAG4.97	Undetermined
MMETSP0190	Forminafera	unknown	Rosalina sp.	Undetermined
MMETSP1385	Foraminifera	unknown	Elphidium margaritaceum	Undetermined
MMETSP1384	Foraminifera	Globothalamea	Ammonia sp.	Undetermined
MMETSP0413	Evosea	unknown	Filamoeba nolandi NC-AS-23-1	Undetermined
MMETSP0811	Euglenozoa	Euglenida	Eutreptiella gymnastica-like CCMP1594	Undetermined
MMETSP0039	Euglenozoa	Euglenida	Eutreptiella gymnastica NIES-381	Undetermined
MMETSP1114	Euglenozoa	Kinetoplastea	Neobodo designis CCAP 1951/1	Undetermined
MMETSP0405	Discosea	Flabellinia	Trichosphaerium sp Am-I-7 wt	Undetermined
MMETSP0420	Discosea	Flabellinia	Pessonella sp. PRA-29	Undetermined
MMETSP0151	Discosea	Flabellinia	Paramoeba atlantica 621/1 / CCAP 1560/9	Undetermined
MMETSP0161	Discosea	Flabellinia	Neoparamoeba aestuarina SoJaBio B1-5/56/2	Undetermined
MMETSP0417	Discosea	unknown	Mayorella sp BSH-02190019	Undetermined
MMETSP0173	Discosea	Flabellinia	Vexillifera sp. DIVA3 564/2	Undetermined
MMETSP0168	Discosea	Flabellinia	Vannella sp. DIVA3 517/6/12	Undetermined
MMETSP0447	Discosea	unknown	Stygamoeba regulata BSH-02190019	Undetermined
MMETSP0225	Dinophyta	Dinophyceae	Thoracosphaera heimii CCCM 670 (=CCMP 1069)	High
MMETSP0229	Dinophyta	Cryptophyceae	Pyrocystis lunula CCCM 517	Low
MMETSP0251	Dinophyta	Dinophyceae	Prorocentrum micans CCCM 845	High or Undetermined
MMETSP0252	Dinophyta	Dinophyceae	Prorocentrum lima CCMP 684	High or Undetermined
MMETSP1424	Dinophyta	Dinophyceae	Oxyrrhis marina LB1974	Undetermined
MMETSP0451C	Dinophyta	Dinophyceae	Oxyrrhis marina CCMP1795 (combined sample which includes MMETSP0451 and MMETSP0452)	Undetermined
MMETSP0044	Dinophyta	Dinophyceae	Oxyrrhis marina CCMP1788	Undetermined
MMETSP0468	Dinophyta	Dinophyceae	Oxyrrhis marina	Undetermined
MMETSP1147	Dinophyta	Dinophyceae	Lessardia elongata SPMC 104	Undetermined
MMETSP1148	Dinophyta	Dinophyceae	Gyrodinium dominans SPMC 103	Low
MMETSP0795	Dinophyta	Dinophyceae	Amoebophrya sp. Ameob2	Undetermined
MMETSP0328	Dinophyta	Dinophyceae	Alexandrium minutum CCMP113	High
MMETSP0347	Dinophyta	Dinophyceae	Alexandrium fundyense CCMP1719	High
MMETSP1091	Cryptophyta	Cryptophyceae	Rhodomonas sp. CCMP768	Low or Undetermined
MMETSP1047	Cryptophyta	Cryptophyceae	Rhodomonas salina CCMP1319	Low or Undetermined
MMETSP0484	Cryptophyta	Cryptophyceae	Rhodomonas lens RHODO	Low or Undetermined
MMETSP1101	Cryptophyta	Cryptophyceae	Rhodomonas abbreviata Caron Lab Isolate	Low or Undetermined
MMETSP1049	Cryptophyta	Cryptophyceae	Proteomonas sulcata CCMP704	detected
MMETSP1355	Cryptophyta	Cryptophyceae	Hemiselmis tepida CCMP443	Undetermined
MMETSP1357	Cryptophyta	Cryptophyceae	Hemiselmis rufescens PCC563	Undetermined
MMETSP0043	Cryptophyta	Cryptophyceae	Hemiselmis andersenii CCMP644	Undetermined
MMETSP1043	Cryptophyta	Cryptophyceae	Hemiselmis andersenii CCMP441	Undetermined
MMETSP1041	Cryptophyta	Cryptophyceae	Hemiselmis andersenii CCMP439	Undetermined
MMETSP1042	Cryptophyta	Cryptophyceae	Hemiselmis andersenii CCMP1180	Undetermined
MMETSP1048	Cryptophyta	Cryptophyceae	Hanusia phi CCMP325	Undetermined
MMETSP0046	Cryptophyta	Cryptophyceae	Guillardia theta CCMP 2712	Undetermined
MMETSP0114	Cryptophyta	Cryptophyceae	Goniomonas sp m	Undetermined
MMETSP0107	Cryptophyta	Cryptophyceae	Goniomonas pacifica CCMP1869	Undetermined
MMETSP1102	Cryptophyta	Cryptophyceae	Geminigera sp. Caron Lab Isolate	Undetermined
MMETSP0799	Cryptophyta	Cryptophyceae	Geminigera cryophila CCMP2564	Undetermined
MMETSP0038	Cryptophyta	Cryptophyceae	Cryptomonas paramecium CCAP977/2a	High or Undetermined
MMETSP1050	Cryptophyta	Cryptophyceae	Cryptomonas curvata CCAP979/52	High or Undetermined
MMETSP0018	Ciliophora	Oligohymenophorea	Uronema sp. Bbcil	Undetermined
MMETSP0472	Ciliophora	Prostomatea	Tiarina fusus LIS	Undetermined
MMETSP0449	Ciliophora	Spirotrichea	Strombidium rassoulzadegani ras09	Undetermined
MMETSP0208	Ciliophora	Spirotrichea	Strombidium inclinatum S3	Undetermined
MMETSP0463	Ciliophora	Spirotrichea	Strombidinopsis sp SopsisLIS2011	Undetermined
MMETSP0211	Ciliophora	Spirotrichea	Pseudokeronopsis sp. OXSARD2	Undetermined
MMETSP1396	Ciliophora	Spirotrichea	Pseudokeronopsis sp. Brazil	Undetermined
MMETSP0216	Ciliophora	Spirotrichea	Protocruzia adherens Boccale	Undetermined
MMETSP0127	Ciliophora	Colpodea	Platyophrya macrostoma WH	Undetermined
MMETSP0798	Ciliophora	unknown	Myrionecta rubra CCMP2563	Undetermined
MMETSP0209	Ciliophora	Litostomatea	Litonotus pictus P1	Undetermined
MMETSP0436	Ciliophora	Spirotrichea	Favella taraikaensis Fe Narragansett Bay	Undetermined
MMETSP0123	Ciliophora	Spirotrichea	Favella ehrenbergii Fehren 1	Undetermined
MMETSP1345	Ciliophora	Heterotrichea	Fabrea Fabrea salina	Undetermined
MMETSP0213	Ciliophora	Spirotrichea	Euplotes harpa FSP1.4	Undetermined
MMETSP1380	Ciliophora	Spirotrichea	Euplotes crassus CT5	Undetermined
MMETSP0210	Ciliophora	Heterotrichea	Condylostoma magnum COL2	Undetermined
MMETSP1397	Ciliophora	Heterotrichea	Climacostomum virens Stock W-24	Undetermined
MMETSP1395	Ciliophora	Heterotrichea	Blepharisma japonicum Stock R1072	Undetermined
MMETSP0125	Ciliophora	Oligohymenophorea	Aristerostoma sp. ATCC 50986	Undetermined
MMETSP1018	Ciliophora	Oligohymenophorea	Anophryoides haemophila AH6	Undetermined
MMETSP0419	Chlorophyta	Chlorodendrophyceae	Tetraselmis sp. GSL018	High or low
MMETSP1445	Chlorophyta	Prasinophyceae	Pyramimonas sp. CCMP2087	Undetermined
MMETSP1169	Chlorophyta	Prasinophyceae	Pyramimonas obovata CCMP722	Undetermined
MMETSP1081	Chlorophyta	Prasinophyceae	Pyramimonas amylifera CCMP720	Undetermined
MMETSP1085	Chlorophyta	Prasinophyceae	Pycnococcus sp CCMP1998	High
MMETSP1471	Chlorophyta	Prasinophyceae	Pycnococcus provasolii RCC733	High
MMETSP1438	Chlorophyta	Prasinophyceae	Pterosperma sp. CCMP1384	Undetermined
MMETSP1315	Chlorophyta	Prasinophyceae	Prasinoderma singularis RCC927	Undetermined
MMETSP0806	Chlorophyta	Prasinophyceae	Prasinoderma coloniale CCMP1413	Undetermined
MMETSP0941	Chlorophyta	Prasinophyceae	Prasinococcus capsulatus CCMP1194	Undetermined
MMETSP0052	Chlorophyta	Chlorophyceae	Polytomella parva SAG 63-3	Undetermined
MMETSP1330	Chlorophyta	Trebouxiophyceae	Picochlorum sp. RCC944	Undetermined
MMETSP1161	Chlorophyta	Trebouxiophyceae	Picochlorum oklahomensis CCMP2329	Undetermined
MMETSP0932	Chlorophyta	Prasinophyceae	Ostreococcus mediterraneus clade-D-RCC2596	Undetermined
MMETSP0937	Chlorophyta	Prasinophyceae	Ostreococcus mediterraneus clade-D-RCC2593	Undetermined
MMETSP0930	Chlorophyta	Prasinophyceae	Ostreococcus mediterraneus clade-D-RCC1621	Undetermined
MMETSP0034	Chlorophyta	Nephroselmidophyceae	Nephroselmis pyriformis CCMP717	Low
MMETSP1393	Chlorophyta	Prasinophyceae	Micromonas sp CS-222	High or low
MMETSP1327	Chlorophyta	Prasinophyceae	Micromonas pusilla RCC2306	High or low
MMETSP1128	Chlorophyta	Chlorophyceae	Dunaliella tertiolecta CCMP1320	Undetermined
MMETSP0803	Chlorophyta	Mamiellophyceae	Crustomastix stigmata CCMP3273	Undetermined
MMETSP1391	Chlorophyta	Chlorophyceae	Chlamydomonas leiostraca SAG 11-49	Low
MMETSP0063	Chlorophyta	Chlorophyceae	Chlamydomonas euryale CCMP219	Low
MMETSP1392	Chlorophyta	Chlorophyceae	Chlamydomonas chlamydogama SAG 11-48b	Low
MMETSP1180	Chlorophyta	Chlorophyceae	Chlamydomonas cf sp CCMP681	Low
MMETSP0045	Chlorarachniophyta	Chlorarachniophyceae	Bigelowiella natans CCMP 2755	High
MMETSP1318	Cercozoa	Chlorarachnea	Partenskyella glossopodia RCC365	Undetermined
MMETSP0186	Cercozoa	Ascetosporea	Minchinia chitonis	Undetermined
MMETSP0040	Cercozoa	Chlorarachniophyceae	Lotharella oceanica CCMP622	Undetermined
MMETSP0112	Cercozoa	Chlorarachniophyceae	Lotharella globosa CCCM811	Undetermined
MMETSP0042	Cercozoa	Chlorarachniophyceae	Lotharella amoebiformis CCMP2058	Undetermined
MMETSP0110	Cercozoa	Chlorarachniophyceae	Gymnochlora sp. CCMP2014	Undetermined
MMETSP0109	Cercozoa	Chlorarachniophyceae	Chlorarachnion reptans CCCM449	Undetermined
MMETSP1175	Bacillariophyta	Bacillariophyceae	Triceratium dubium CCMP147	Undetermined
MMETSP0152	Bacillariophyta	Fragilariophyceae	Thalassiothrix antarctica L6-D1	Undetermined
MMETSP0878	Bacillariophyta	Coscinodiscophyceae	Thalassiosira weissflogii CCMP1336	Low
MMETSP1414	Bacillariophyta	Coscinodiscophyceae	Thalassiosira weissflogii CCMP1010	Low
MMETSP1059	Bacillariophyta	Coscinodiscophyceae	Thalassiosira sp. FW	Low
MMETSP1067	Bacillariophyta	Coscinodiscophyceae	Thalassiosira punctigera Tpunct2005C2	Low
MMETSP0786	Bacillariophyta	Fragilariophyceae	Thalassionema frauenfeldii CCMP 1798	Undetermined
MMETSP0800	Bacillariophyta	Bacillariophyceae	Striatella unipunctata CCMP2910	Undetermined
MMETSP0794	Bacillariophyta	Coscinodiscophyceae	Stephanopyxis turris CCMP 815	Undetermined
MMETSP1361	Bacillariophyta	Fragilariophyceae	Staurosira complex sp. CCMP2646	Undetermined
MMETSP1352	Bacillariophyta	Bacillariophyceae	Stauroneis constricta CCMP1120	Undetermined
MMETSP0319	Bacillariophyta	Coscinodiscophyceae	Skeletonema marinoi SM1012Hels-07	Low
MMETSP0320	Bacillariophyta	Coscinodiscophyceae	Skeletonema marinoi SM1012Den-03	Low
MMETSP0789	Bacillariophyta	Coscinodiscophyceae	Rhizosolenia setigera CCMP 1694	Low
MMETSP1423	Bacillariophyta	Bacillariophyceae	Pseudo-nitzschia heimii UNC1101	Low
MMETSP0329	Bacillariophyta	Bacillariophyceae	Pseudo-nitzschia arenysensis B593	Low
MMETSP0160	Bacillariophyta	Collembola	Odontella Sinensis Grunow 1884	Undetermined
MMETSP0015	Bacillariophyta	Collembola	Odontella aurita isolate 1302-5	Undetermined
MMETSP0014	Bacillariophyta	Monogenea	Nitszchia sp. RCC80	Undetermined
MMETSP1322	Bacillariophyta	Coscinodiscophyceae	Minutocellus polymorphus RCC2270	Undetermined
MMETSP1070	Bacillariophyta	Coscinodiscophyceae	Minutocellus polymorphus NH13	Undetermined
MMETSP1434	Bacillariophyta	Bacillariophyceae	Minutocellus polymorphus CCMP3303	Undetermined
MMETSP0321	Bacillariophyta	Coscinodiscophyceae	Leptocylindrus danicus var. danicus B650	Undetermined
MMETSP0322	Bacillariophyta	Coscinodiscophyceae	Leptocylindrus danicus var. apora B651	Undetermined
MMETSP1362	Bacillariophyta	Coscinodiscophyceae	Leptocylindrus danicus CCMP1856	Undetermined
MMETSP1171	Bacillariophyta	Mediophyceae	Helicotheca tamensis CCMP826	Undetermined
MMETSP0009	Bacillariophyta	Fragilariophyceae	Grammatophora oceanica CCMP 410	Undetermined
MMETSP0909	Bacillariophyta	Bacillariophyceae	Fragilariopsis kerguelensis L2-C3	Low
MMETSP0736	Bacillariophyta	Bacillariophyceae	Fragilariopsis kerguelensis L26-C5	Low
MMETSP1437	Bacillariophyta	Coscinodiscophyceae	Eucampia antarctica CCMP1452	Undetermined
MMETSP1443	Bacillariophyta	Bacillariophyceae	Entomoneis sp. CCMP2396	Undetermined
MMETSP1063	Bacillariophyta	Coscinodiscophyceae	Ditylum brightwellii Pop2 (SS10)	Low
MMETSP1062	Bacillariophyta	Coscinodiscophyceae	Ditylum brightwellii Pop1 (SS4)	Low
MMETSP1001	Bacillariophyta	Coscinodiscophyceae	Ditylum brightwellii GSO105	Low
MMETSP1012	Bacillariophyta	Coscinodiscophyceae	Ditylum brightwellii GSO104	Low
MMETSP1005	Bacillariophyta	Coscinodiscophyceae	Ditylum brightwellii GSO103	Low
MMETSP0580	Bacillariophyta	Coscinodiscophyceae	Dactyliosolen fragilissimus	Undetermined
MMETSP1057	Bacillariophyta	Coscinodiscophyceae	Cyclotella meneghiniana CCMP 338	Undetermined
MMETSP0397	Bacillariophyta	Bacillariophyceae	Cyclophora tenuis ECT3854	Undetermined
MMETSP0171	Bacillariophyta	Coscinodiscophyceae	Corethron pennatum L29A3	Undetermined
MMETSP0010	Bacillariophyta	Coscinodiscophyceae	Corethron hystrix 308	Undetermined
MMETSP0200	Bacillariophyta	Coscinodiscophyceae	Chaetoceros sp. GSL56	Low or Undetermined
MMETSP0754	Bacillariophyta	Coscinodiscophyceae	Chaetoceros neogracile CCMP1317	Low or Undetermined
MMETSP1447	Bacillariophyta	Bacillariophyceae	Chaetoceros dichaeta CCMP1751	Low or Undetermined
MMETSP0150	Bacillariophyta	Coscinodiscophyceae	Chaetoceros debilis MM31A-1	Low or Undetermined
MMETSP0719	Bacillariophyta	Coscinodiscophyceae	Chaetoceros curvisetus	Low or Undetermined
MMETSP1336	Bacillariophyta	Bacillariophyceae	Chaetoceros cf. neogracile RCC1993	Low or Undetermined
MMETSP1435	Bacillariophyta	Bacillariophyceae	Chaetoceros brevis CCMP164	Low or Undetermined
MMETSP0092	Bacillariophyta	Coscinodiscophyceae	Chaetoceros affinis CCMP159	Low or Undetermined
MMETSP1429	Bacillariophyta	Coscinodiscophyceae	Chaetoceros sp. UNC1202	Low or Undetermined
MMETSP1064	Bacillariophyta	Coscinodiscophyceae	Aulacoseira subarctica CCAP 1002/5	Undetermined
MMETSP0418	Bacillariophyta	Fragilariophyceae	Astrosyne radiata 13vi08-1A	Undetermined
MMETSP1394	Bacillariophyta	Fragilariophyceae	Asterionellopsis glacialis CCMP1581	Undetermined
MMETSP0708	Bacillariophyta	Fragilariophyceae	Asterionellopsis glacialis CCMP134	Undetermined
MMETSP0713	Bacillariophyta	Fragilariophyceae	Asterionellopsis glacialis	Undetermined
MMETSP0724	Bacillariophyta	Bacillariophyceae	Amphiprora sp. CCMP467	Undetermined
MMETSP1065	Bacillariophyta	Bacillariophyceae	Amphiprora paludosa CCMP125	Undetermined
MMETSP0235	Ascomycota	Saccharomycetes	Debaryomyces hansenii J26	Undetermined
MMETSP0372	Apicomplexa	Gregarinia	Lankesteria abbottii Grappler Inlet BC	Undetermined
MMETSP0288	Apicomplexa	Aconoidasia	Alveolata sp. CCMP3155	Undetermined
MMETSP1451	Alveolata	Chromerida	Vitrella brassicaformis CCMP3346	Undetermined
MMETSP1317	unknown	unknown	Undescribed Undescribed Undescribed	Undetermined
MMETSP1453	unknown	unknown	Undescribed Undescribed RCC701	Undetermined
MMETSP1456	unknown	unknown	Undescribed Undescribed RCC1871	Undetermined
MMETSP1433	unknown	unknown	Undescribed Undescribed NY07348D	Undetermined
MMETSP0087	unknown	unknown	Undescribed Undescribed D1	Undetermined
MMETSP1446	unknown	unknown	Undescribed Undescribed CCMP2111	Undetermined
MMETSP1475	unknown	unknown	Undescribed Undescribed CCMP1999	Undetermined
MMETSP0439	unknown	unknown	Stereomyxa ramosa Chinc5	Undetermined
MMETSP0780	unknown	unknown	Palpitomonas bilix NIES-2562	Undetermined
MMETSP1144	unknown	unknown	non described non described CCMP2298	Undetermined
MMETSP0993	unknown	unknown	non described non described CCMP2098	Undetermined
MMETSP1309	unknown	unknown	Genus nov. species nov. RCC998	Undetermined
MMETSP1311	unknown	unknown	Genus nov. species nov. RCC856	Undetermined
MMETSP1310	unknown	unknown	Genus nov. species nov. RCC2339	Undetermined
MMETSP1312	unknown	unknown	Genus nov. species nov. RCC2335	Undetermined
MMETSP0290	unknown	unknown	Chromera velia CCMP2878	Undetermined
MMETSP0100	unknown	unknown	NY0313808BC1	Undetermined
unknown: no taxonomuc data in MMETSP or NCBI

## Sheet: DSYE_DSYB_TpMMT
Table S4: Summary of organisms have been shown to produce DMSP (modified from Li et al., 2022)
Gene	DSYE					DSYB						TpMMT				no DSYE/DSYB/TpMMT
Category	High producer	Low producer	Low or High producer	Undetermined	Total	High producer	Low producer	Low or High producer	detected	Undetermined	Total	Low producer	Low or High producer	Undetermined	Total	High producer	Low producer	Low or High producer	Low or Undetermined	detected	High or Undetermined	Undetermined	Total
Number of DMSP producers	10	20	12	18	60	38	16	17	4	24	99	8	8	2	18	10	24	5	13	1	4	179	236
Percent of total species(%)	16.6667	33.3333	20	30		38.3838	16.1616	17.1717	4.0404	24.2424	100	44.4444	44.4444	11.1111		4.23729	10.1695	2.11864	5.50847	0.423729	1.69492	75.8475

## Sheet: Sheet1
Predicted DMSP producers contained DSYE	Predicted DMSP producers contained DSYB	Predicted DMSP producers contained no DSYE/DSYB/TpMMT
Bigelowiella longifila CCMP242	Cylindrotheca closterium KMMCC_B 181	Thraustochytrium sp. LLF1b
Bigelowiella natans CCMP1242	Nitzschia punctata CCMP561	Schizochytrium aggregatum ATCC28209
Bigelowiella natans CCMP1258.1	Pseudo-nitzschia delicatissima UNC1205	Rhodosorus marinus UTEX LB 2760
Bigelowiella natans CCMP1259	Pseudo-nitzschia fradulenta WWA7	Rhodosorus marinus CCMP 769
Bigelowiella natans CCMP623	Skeletonema dohrnii SkelB	Rhizochromulina marina cf CCMP1243
Bathycoccus prasinos CCMP1898	Skeletonema grethea CCMP1804	Ochromonas sp. CCMP1393
Bathycoccus prasinos RCC716	Skeletonema japonicum CCMP2506	Ochromonas sp. BG-1
Mantoniella antarctica SL-175	Skeletonema marinoi FE60	Ochromonas sp CCMP1899
Mantoniella sp CCMP1436	Skeletonema marinoi FE7	Thoracosphaera heimii CCCM 670 (=CCMP 1069)
Micromonas pusilla CCAC1681	Skeletonema marinoi SkelA	Pyrocystis lunula CCCM 517
Micromonas pusilla CCMP1723	Skeletonema marinoi UNC1201	Prorocentrum micans CCCM 845
Micromonas pusilla CCMP494	Skeletonema menzelii CCMP793	Prorocentrum lima CCMP 684
Micromonas pusilla RCC1614	Skeletonema costatum 1716	Gyrodinium dominans SPMC 103
Micromonas sp. CCMP1646	Thalassiosira antarctica CCMP982	Alexandrium minutum CCMP113
Micromonas sp. CCMP2099	Thalassiosira gravida GMp14c1	Alexandrium fundyense CCMP1719
Micromonas sp. NEPCC29	Thalassiosira miniscula CCMP1093	Rhodomonas sp. CCMP768
Micromonas sp. RCC451	Thalassiosira oceanica CCMP1005	Rhodomonas salina CCMP1319
Micromonas sp. RCC472	Thalassiosira pseudonana CCMP1335	Rhodomonas lens RHODO
Ostreococcus lucimarinus clade-A-BCC118000	Thalassiosira punctigera Tpunct2005C2	Rhodomonas abbreviata Caron Lab Isolate
Ostreococcus mediterraneus clade-D-RCC1107	Thalassiosira rotula CCMP3096	Proteomonas sulcata CCMP704
Ostreococcus mediterraneus clade-D-RCC2572	Thalassiosira rotula GSO102	Cryptomonas paramecium CCAP977/2a
Ostreococcus mediterraneus clade-D-RCC2573	Thalassiosira sp NH16	Cryptomonas curvata CCAP979/52
Ostreococcus prasinos BCC99000	Alexandrium andersonii CCMP2222	Tetraselmis sp. GSL018
Tetraselmis astigmatica CCMP880	Alexandrium catenella OF101	Pycnococcus sp CCMP1998
Tetraselmis chuii PLY429	Alexandrium margalefi AMGDE01CS 322	Pycnococcus provasolii RCC733
Tetraselmis striata LANL1001	Alexandrium monilatum CCMP3105	Nephroselmis pyriformis CCMP717
Aureococcus anophagefferens CCMP1850	Alexandrium temarense CCMP1771	Micromonas sp CS-222
Chrysocystis fragilis CCMP3189	Amphidinium carterae CCMP1314	Micromonas pusilla RCC2306
Chrysoreinhardia sp CCMP2950	Amphidinium massartii CS259	Chlamydomonas leiostraca SAG 11-49
Chrysoreinhardia sp CCMP3193	Ceratium fusus PA161109	Chlamydomonas euryale CCMP219
Pelagococcus subviridis CCMP1429	Crypthecodinium cohnii Seligo	Chlamydomonas chlamydogama SAG 11-48b
Pelagomonas calceolata CCMP1756	Gambierdiscus australes CAWD149	Chlamydomonas cf sp CCMP681
Pelagomonas calceolata RCC969	Gonyaulax spinifera CCMP409	Bigelowiella natans CCMP 2755
Exanthemachrysis gayraliae RCC1523	Gymnodinium catenatum GC744	Thalassiosira weissflogii CCMP1336
Pavlova sp. CCMP459	Heterocapsa arctica CCMP445	Thalassiosira weissflogii CCMP1010
Pseudo-nitzschia australis 10249 10 AB	Heterocapsa rotundata SCCAP_K 0483	Thalassiosira sp. FW
Pseudo-nitzschia delicatissima B596	Heterocapsa triquetra CCMP448	Skeletonema marinoi SM1012Hels-07
Pseudo-nitzschia delicatissima UNC1205	Karenia brevis CCMP2229	Skeletonema marinoi SM1012Den-03
Pseudo-nitzschia fraudulenta WWA7	Karenia brevis SP1	Rhizosolenia setigera CCMP 1694
Pseudo-nitzschia pungens cf. cingulata	Karenia brevis SP3	Pseudo-nitzschia heimii UNC1101
Pseudo-nitzschia pungens cf. pungens	Karenia brevis Wilson	Pseudo-nitzschia arenysensis B593
Coscinodiscus wailesii CCMP2513	Pelagodinium beii RCC1491	Fragilariopsis kerguelensis L2-C3
42	Prorocentrum minimum CCMP1329	Fragilariopsis kerguelensis L26-C5
	Prorocentrum minimum CCMP2233	Ditylum brightwellii Pop2 (SS10)
	Scrippsiella hangoei SHTV5	Ditylum brightwellii Pop1 (SS4)
	Scrippsiella hangoei SHHI_4	Ditylum brightwellii GSO105
	Scrippsiella trochoidea CCMP3099	Ditylum brightwellii GSO104
	Symbiodinium kawagutii CCMP2468	Ditylum brightwellii GSO103
	Symbiodinium sp C1	Chaetoceros sp. GSL56
	Symbiodinium sp C15	Chaetoceros neogracile CCMP1317
	Symbiodinium sp CCMP2430	Chaetoceros dichaeta CCMP1751
	Symbiodinium sp CCMP421	Chaetoceros debilis MM31A-1
	Symbiodinium sp Mp	Chaetoceros curvisetus
	Calcidiscus leptoporus RCC1130	Chaetoceros cf. neogracile RCC1993
	Chrysochromulina brevifilum UTEX_LB985	Chaetoceros brevis CCMP164
	Chrysochromulina ericina CCMP281	Chaetoceros affinis CCMP159
	Chrysochromulina polylepis CCMP1757	Chaetoceros sp. UNC1202
	Chrysochromulina polylepis UIO037	58
	Chrysochromulina rotalis UIO044
	Coccolithus pelagicus sp braarudi PLY182g
	Emiliania huxleyi 374
	Emiliania huxleyi 379
	Emiliania huxleyi CCMP370
	Emiliania huxleyi PLYM219
	Gephyrocapsa oceanica RCC1303
	Imantonia sp RCC918
	Isochrysis galbana CCMP1323
	Isochrysis sp CCMP1244
	Isochrysis sp CCMP1324
	Phaeocystis antarctica
	Phaeocystis antarctica CCMP1374
	Pleurochrysis carterae CCMP645
	Prymnesium parvum Texoma1
	Pelagococcus subviridis CCMP1429
	Aureococcus anophagefferens CCMP1850
	75
	DSYB+TpMMT	75	44.1176
	DSYE+DSYB+TpMMT	113	66.4706
	Total	170
