# Supplementary material for: Novel dimethylsulfoniopropionate biosynthesis enzymes in diverse marine bacteria, cyanobacteria and abundant algae
Source: Research Square preprint supplement (doi:10.21203/rs.3.rs-2678769/v1), 2023-03-17
Supplement: Supplementary file 3 [file b8cb116d717e4b760451f042.xlsx]

## Sheet: MATOU_MetaG
Supplementary Table 7. Additional algal methyltransferase enzyme relative abundance in metagenome
	DSYB
	Station	latitude	longitude	Dictyochophyceae	Bacillariophyta	Haptophyceae	Dinophyceae	unclasified_Eukaryota
MES	TARA_068	-31.0198	4.6685	0	0	0	0.00161337	0
	TARA_098	-25.8076	-111.691	0	0	0	0.00140006	0
	TARA_109	2.0649	-84.5546	0	0	0.000982278	0.000306354	0.000375052
	TARA_135	33.0339	-121.878	0	0	0.00876724	0.00750029	0
MIX	TARA_153	44.0497	-16.6034	0.000599966	0.00108979	0.00169153	0.00281649	0.000600356
	TARA_152	43.7899	-16.9692	0.00117789	0.000378924	0.00240035	0.00410798	0.000840246
FSW	TARA_039	18.5745	66.4895	0	0	0	0.000651411	0
ZZZ	TARA_040	17.4847	67.9997	0	0	0.00128521	0.00189364	0.000604645
	DSYE
	Station	latitude	longitude	Chlorophyta	Pelagophyceae	Bacillariophyta	Cryptophyta	unclasified_Eukaryota
MES	TARA_068	-31.0198	4.6685	0.00164223	0.000766575	0	0	0
	TARA_109	2.0649	-84.5546	0	0.0130904	0	0	0
	TARA_135	33.0339	-121.878	0	0.0168969	0	0	0
	TARA_149	34.0771	-49.8233	0.000536437	0	0	0	0
	TARA_138	6.3559	-103.06	0	0.000907768	0	0	0
MIX	TARA_152	43.7899	-16.9692	0.0017543	0.0136128	4.79796e-05	0	2.00956e-05
	TARA_153	44.0497	-16.6034	0.00123006	0.00721426	1.41905e-05	0	0
FSW	TARA_039	18.5745	66.4895	0.00113304	0.00941156	0.000510793	0	0
ZZZ	TARA_040	17.4847	67.9997	0	0.0010841	9.19154e-05	0	0
	TpMMT
	Station	latitude	longitude	Chlorophyta	Pelagophyceae	Bacillariophyta	Cryptophyta	unclasified_Eukaryota
MIX	TARA_152	43.7899	-16.9692	0	0	2.18605e-05	0	0
	TARA_153	44.0497	-16.6034	0	0	1.22167e-05	0	0
FSW	TARA_039	18.5745	66.4895	0	0	0.000436646	0	0

## Sheet: MATOU_MetaT
Supplementary Table 7. Additional algal methyltransferase enzyme transcript abundance in metatranscriptome
	DSYB
	Station	latitude	longitude	Pelagophyceae	Dictyochophyceae	Bacillariophyta	Haptophyceae	Dinophyceae	unclasified_Eukaryota
MES	TARA_098	-25.8076	-111.691	0	0	0	0	0.000151517	0
	TARA_109	2.0649	-84.5546	0	0	0	0	1.84382e-05	0
	TARA_135	33.0339	-121.878	6.68033e-08	0	0	5.58425e-06	0.000151517	0
	TARA_149	34.0771	-49.8233	8.85127e-08	0	0	0	0	0
	TARA_138	6.3559	-103.06	0	0	0	0	5.50637e-05	0
MIX	TARA_152	43.7899	-16.9692	0	5.56885e-06	4.7946e-06	0.000114413	0.000816462	0.000101431
	TARA_153	44.0497	-16.6034	6.27582e-07	2.39e-06	3.26902e-06	7.62533e-05	0.000570823	7.19098e-05
FSW	TARA_039	18.5745	66.4895	0	0	0	1.20895e-05	0.000220156	2.97884e-05
ZZZ	TARA_040	17.4847	67.9997	0	1.10979e-06	9.21862e-07	3.19946e-06	0.000186304	4.11106e-06
	DSYE
	Station	latitude	longitude	Chlorophyta	Pelagophyceae	Bacillariophyta	Cryptophyta	unclasified_Eukaryota
MES	TARA_109	2.0649	-84.5546	0	7.05694e-06	0	0	0
	TARA_135	33.0339	-121.878	5.6401e-06	5.58425e-06	0	0	0
MIX	TARA_152	43.7899	-16.9692	2.22443e-05	0.000383652	6.34451e-05	0	1.8507e-05
	TARA_153	44.0497	-16.6034	1.00307e-05	0.000223676	3.63188e-05	0	9.08707e-06
FSW	TARA_039	18.5745	66.4895	3.82569e-05	0.000225061		0	0
ZZZ	TARA_040	17.4847	67.9997	0	0.0392455	0.0392455	0.0392455	0.0392455
	TpMMT
	Station	latitude	longitude	Chlorophyta	Pelagophyceae	Bacillariophyta	Cryptophyta	unclasified_Eukaryota
MIX	TARA_152	43.7899	-16.9692	0	0	7.74331e-06	0	0
	TARA_153	44.0497	-16.6034	0	0	3.49175e-06	0	0
