# Supplementary material for: Novel dimethylsulfoniopropionate biosynthesis enzymes in diverse marine bacteria, cyanobacteria and abundant algae
Source: Research Square preprint supplement (doi:10.21203/rs.3.rs-2678769/v1), 2023-03-17
Supplement: Supplementary file 4 [file ce307572f4b0a2bd85b85308.xlsx]

## Sheet: Sheet1
Supplentary Table 3:Retrieved DsyD taxonomy information and amino acid sequences
MMETSP ID	species	Top Hit ratified DsyD contained species	identity	e-value	coverage	aa	sequence
MMETSP0113_10238|m.14242	Norrisiella_sphaerica_BC52	Oscillatoria sp.SIO1A7	26.923	1.76e-06	35	152	IELLNSKKKIYSYVESRMNLIAPNLTAIIGPEIAARLMGIAGGLKELSEMPSCNMQVLGV KRNILGGFASTVANMHQGMLGQTDIMINTPADLKQRAIRLLAAKCALAARIDSYMTTAQS NSAEGVRLREVIIKKIEKWQEPPPPKANKA
MMETSP0111_12538|m.23843	Lotharella_globosa_CCCM811	Oscillatoria sp.SIO1A7	25	5.7e-06	12	423	MDLIQTMNNQTDADKEEEYGVIVKSNELTGKIDQEMLSIHKYIRDLYATKFPELSELVPH PYEYAQVVKTIGNRTDVSNLDLSEFVSQNVQLTITVTATTTSGKPLPPEVLKQVLEGCDA IIELLNSKKKIYSYVESRMNLIAPNLTAIIGSDIAARILGVAGGLKELSEMPSCNMQVLG VKRNILGGFANSAANMHQGILAETDIMLTTPMDLKQRAIRLLAAKCALAARIDSYMTTSQ SNSAEGVKLREQIVKKIEKWQEPPPPKAKKALPVPMDKPRKRRGGKRYRKQRERMKITEL MKQKNRMVFGKAQITDEYTGQDFGMIGVSGTGQLRVNVEDNQKLKKRLARKTKAQLRRIV PGSTTRKVSGTQSSFAMTPVQGIELVNKNNRAE…
MMETSP0108_11771|m.27574	Goniomonas_pacifica_CCMP1869	G. sunshinyii YC6258	40	5.36e-06	9	587	MDTLLTLLSYPGLATLAVVALIALIFYKRSLRLLGFVIVPDDSIGTVTKNFVLFGRHKEL PPGRIVALYGEAGLQADTLAPGLHLGLWPWQYQVDLVKFTVVPDDAIGIVEACDGLPLPD GRVLARHVDCDNFQDARAFLAAGERGLQMTVVPPGAWRINTLLFTVRLERMTVIEPGKIG IVEARDGRPLTGGRVIGRTVACDSFQDARAFMAGGGERGPQMSVIPQGKYRINPGLFKVT QVQVTDVPDNKVGIVTTREGASLATGEIAGPEVPGHNLFQDPQAFVNAGGTKGLQEQVLL AGRYFINPMFATVEIIDMTEVPIASVGVVVAFVGKAGVDVTGEGFRHANMVRRGEKGVWV DVLDPGKYAINTYTHKVRVVPTANVVLNWATGK…
MMETSP0106_30149|m.90353	Acanthoeca-like_sp._10tr	Oscillatoria sp.SIO1A7	27.053	1.74e-13	72	290	HTRAVMAASLLARLRAGVPLRRACDLSTAAVARAGPVHSSPPPRALSSPHGDSDPFVFSR DNFRRPHLPEGLRVLDVALEPATNDALQGLGRLIHSADEVTVEAGNFEIVPWPVQGWRQL DPETGDEAGTTEGHFDVHWEGDFFYGTNLAVATANNVYLDGLGAHPDEATPTAEPAAEGA IYLWMSDYHPDGGQLFFPTSEGGTPFVVCLGPAAKGDDIAPADMRAFAVPPGAGVYLEPG TWHNGVYAAPAECPARFLTRQGKVHARVSCSWAAEFNTVLRVPLAL
MMETSP0105_15444|m.39926	Acanthoeca-like_sp._10tr	Oscillatoria sp.SIO1A7	27.053	1.78e-13	71	175	GGPHTRAVMAASLLARLRAGVPLRRACDLSTAAVARAGPVHSSPPPRALSSPHGDSDPFV FSRDNFRRPHLPEGLRVLDVALEPATNDALQGLGRLIHSADEVTVEAGNFEIVPWPVQGW RQLDPETGDEAGTTEGHFDVHWEGDFFYGTNLAVATANNVYLDGLGAHPDEATPTAEPAA EGAIYLWMSDYHPDGGQLFFPTSEGGTPFVVCLGPAAKGDDIAPADMRAFAVPPGAGVYL EPGTWHNGVYAAPAECPARFLTRQGKVHARVSCSWAAEFNTVLRVPLAL
MMETSP0105_15443|m.39922	Acanthoeca-like sp. 10tr	Oscillatoria sp.SIO1A7	29.487	1.25e-13	89	175	ATANRQLDPETGDEAGTTEGHFDVHWEGDFFYGTNLAVATANNVYLDGLGAHPDEATPTA EPAAEGAIYLWMSDYHPDGGQLFFPTSEGGTPFVVCLGPAAKGDDIAPADMRAFAVPPGA GVYLEPGTWHNGVYAAPAECPARFLTRQGKVHARVSCSWAAEFNTVLRVPLAL
MMETSP0104_13166|m.21550	Paraphysomonas_imperforata_PA2	G. sunshinyii YC6258	26.415	4.14e-06	42	255	MSDDAKVSEPFVFTSENFQDPKLPSGLDVVEIVPLEATDESLKGFGCLVRDPIDFTTENK TFEIVQWPAQGWRKLDPDTGDEAGTTEGCFNVRWQGDYYYSKNLAVSTTNNAYLDGLSAM PELATHDELARHQQVTDQAIYLWMSDYHPDGGQLFWPMETKIPFTVCLGLPSCGDDVQPA DMKAFHIPSGYGLYIHPGTWHNGIYVSRQHAPATFLTRQGKVHARISANWATEFRCLLKI PLSPPTGSECS
MMETSP0103_16894|m.31746	Paraphysomonas_imperforata_PA2	G. sunshinyii YC6258	26.415	4.14e-06	42	255	MSDDAKVSEPFVFTSENFQDPKLPSGLDVVEIVPLEATDESLKGFGCLVRDPIDFTTENK TFEIVQWPAQGWRKLDPDTGDEAGTTEGCFNVRWQGDYYYSKNLAVSTTNNAYLDGLSAM PELATHDELARHQQVTDQAIYLWMSDYHPDGGQLFWPMETKIPFTVCLGLPSCGDDVQPA DMKAFHIPSGYGLYIHPGTWHNGIYVSRQHAPATFLTRQGKVHARISANWATEFRCLLKI PLSPPTGSECS
MMETSP0097_29346|m.92643	Alexandrium monilatum, Strain CCMP3105	Oscillatoria sp.SIO1A7	26.852	7.12e-15	73	296	GICGILRLCAGWDRALTMMPALRGLWRPWALAGARSRLPGTAVRGVAVGASGVQAATGAT PAYVFSHENFRAPKLPAGLAVRDVQREVATDEALKGLGVVVHNPDDFTVARRTFEIERWP QPDWRPLDPGTGDEAGTTEGDFEVHWQGDYYRAENLAVATDNNKYLDGLGSLPERASEDG PASAEAIYLWMSDYHPDGGQLFWPREPVPFVVCLGPAARGDNIRPEDMRAFLVPAGQGIY LHPGTWHNGVYVAPEYADRQPRRFLTRQGRVHARVSCSWAVEFGCLLRVPLC
MMETSP0097_19146|m.60885	Alexandrium_monilatum_CCMP3105	Symploca sp. SIO3E6	29.167	3.13e-06	16	454	ATWKDQACVRTSQIHWREDHSVSWLERHMEMTQGFVIIGKNPGLFVFGEPTHDREDLDEK QRARPDPSRIKVLIVPAGCGIILRLGTWHDFPVSCGPPVSCFILNTEEVVAALASMGTAA PMNHGDCFKLRLSDHWDFTLKFKDPRPFVRQHGLCHVPPPMPPISIDYGAGMVRQEVKGG WGGEARVFVVPVVNVEVFVPGCGGPAIQPHLQSVPEVANKGWRDYGNRRGLQRLSDMFKS LGIPATAVINSDAAKLEFVAKALKESGWELGAHGINNSSGNAKMNRNEEEAIFKQCLDEL EASLGTRPVTWLTPGFSVTERTPEIAAGAGIKAFLDFVDDDVPYDLLHEESGKRMLCLPY CMETNDFSLVLTKNFDPRQYAQTLEDHVRQLAK…
MMETSP0096_68168|m.210740	Alexandrium_monilatum_CCMP3105	Symploca sp. SIO3E6	29.167	3.66e-06	19	383	SSLRLGGPSRRLACGKVPVTKAKLDGMVADGKRAREGEEREVRHLDLEIATRENTKPFGY FIDDQVENPGLGIPFYKTVIEGANYAHATWKDQACVRTSQIHWREDHSVSWLERHMEMTQ GFVIIGKNPGLFVFGEPTHDREDLDEKQRARPDPSRIKVLIVPAGCGIILRLGTWHDFPV SCGPPVSCFILNTEEVVAALASMGTAAPMNHGDCFKLRLSEHWDFTLKFKDPRPFVRQHG LCHVPPPMPPISSDYGAGMLRQEVKGGWGGESRVFVVPVVNVEVFMPGCGGPAIQPHLQS VPEVANKGWRDYGNRRGLQRLSDMFKSLGIPATAVINSDAAKLEFVAKALKESGWELGAH GINNSSGNARMNRKEEE
MMETSP0096_68167|m.210731	Alexandrium_monilatum_CCMP3105	Symploca sp. SIO3E6	29.167	3.79e-06	13	542	SSLRLGGPSRRLACGKVPVTKAKLDGMVADGKRAREGEEREVRHLDLEIATRENTKPFGY FIDDQVENPGLGIPFYKTVIEGANYAHATWKDQACVRTSQIHWREDHSVSWLERHMEMTQ GFVIIGKNPGLFVFGEPTHDREDLDEKQRARPDPSRIKVLIVPAGCGIILRLGTWHDFPV SCGPPVSCFILNTEEVVAALASMGAAAPMNHGDCFKLRLSDHWDFTLKFKDPRPFVRQHG LCHVPPPMPPISSDYGAGMLRQEVKGGWGGESRVFVVPVVNVEVFMPGCGGPAIQPHLQS VPEVANKGWRDYGNRRGLQRLSDMFKSLGIPATAVINSDAAKLEFVAKALKESGWELGAH GINNSSGNAKMNRNEEEAIFKQCLDELEASLGT…
MMETSP0096_18487|m.57910	Alexandrium_monilatum_CCMP3105	Oscillatoria sp.SIO1A7	27.485	2.44e-09	97	177	FRAPKLPAGLAVRDVQREVATDEALKGLGVVVHNPDDFTVARRTFEIERWPQPDWRPLDP GTGDEAGTTEGDFEVHWQGDYYRAENLAVATDNNKYLDGLGSLPERASEDGPASAEAIYL WMSDYHPDGGQLFWPREPVPFVVCLGPAARGDNIRPEDMRAFLVPAGQGIYLHPG
MMETSP0095_12816|m.39605	Alexandrium monilatum, Strain CCMP3105	Symploca sp. SIO3E6	29.167	3.88e-06	13	544	FGSSLRLGGPSRRLACGKVPVTKAKLDGMVADGKRAREGEEREVRHLDLEIATRENTKPF GYFIDDQVENPGLGIPFYKTVIEGANYAHATWKDQACVRTSQIHWREDHSVSWLERHMEM TQGFVIIGKNPGLFVFGEPTHDREDLDEKQRARPDPSRIKVLIVPAGCGIILRLGTWHDF PVSCGPPVSCFILNTEEVVAALASMGTAAPMNHGDCFKLRLSDHWDFTLKFKDPRPFVRQ HGLCHVPPPMPPISSDYGAGMLRQEVKGGWGGESRVFVVPVVNVEVFMPGCGGPAIQPHL QSVPEVANKGWRDYGNRRGLQRLSDMFKSLGIPATAVINSDAAKLEFVAKALKESGWELG AHGINNSSGNAKMNRNEEEAIFKQCLDELEASL…
MMETSP0095_101173|m.316073	Alexandrium monilatum, Strain CCMP3105	Oscillatoria sp.SIO1A7	27.778	5.16e-15	82	264	GARSRLPGTAVRGVAVGASGVQAATGATPAYVFSHENFRAPKLPAGLAVRDVQREVATDE ALKGLGVVVHNPDDFTVARRTFEIERWPQPDWRPLDPGTGDEAGTTEGDFEVHWQGDYYR AENLAVATDNNKYLDGLGSLPERASEDGPASAEAIYLWMSDYHPDGGQLFWPREPVPFVV CLGPAARGDNIRPEDMRAFLVPAGQGIYLHPGTWHNGVYVAPEYADRQPRRFLTRQGRVH ARVSCSWAVEFGCLLRVPLC
MMETSP0093_36283|m.108445	Alexandrium monilatum, Strain CCMP3105	Symploca sp. SIO3E6	29.167	3.89e-06	13	542	FALGRWGSGRLACGKVPVTKAKLDGMVADGKRAREGEEREVRHLDLEIATRENTKPFGYF IDDQVENPGLGIPFYKTVIEGANYAHATWKDQACVRTSQIHWREDHSVSWLERHMEMTQG FVIIGKNPGLFVFGEPTHDREDLDEKQRARPDPSRIKVLIVPAGCGIILRLGTWHDFPVS CGPPVSCFILNTEEVVAALASMGTAAPMNHGDCFKLRLSDHWDFTLKFKDPRPFVRQHGL CHVPPPMPPISSDYGAGMLRQEVKGGWGGEARVFVVPVVNVEVFMPGCGGPAIQPHLQSV PEVANKGWRDYGNRRGLQRLSDMFKSLGIPATAVINSDAAKLEFVAKALKESGWELGAHG INNSSGNARMNRKEEEAVFKQCLDELEASLGKR…
MMETSP0093_31591|m.94061	Alexandrium monilatum, Strain CCMP3105	Oscillatoria sp.SIO1A7	27.778	4.95e-15	83	263	ARSRLPGTAVRGVAVGASGVQAATGATPAYVFSHENFRAPKLPAGLAVRDVQREVATDEA LKGLGVVVHNPDDFTVARRTFEIERWPQPDWRPLDPGTGDEAGTTEGDFEVHWQGDYYRA ENLAVATDNNKYLDGLGSLPERASEDGPASAEAIYLWMSDYHPDGGQLFWPREPVPFVVC LGPAARGDNIRPEDMRAFLVPAGQGIYLHPGTWHNGVYVAPEYADRQPRRFLTRQGRVHA RVSCSWAVEFGCLLRVPLC
MMETSP0087_40492|m.79465	undescribed_Strain D1	G. sunshinyii YC6258	25.352	7.19e-06	73	97	KAAEAGNAGAQYNLGRCYDNGRGVPQDHKKAVEWWSKAAEAGNATAQKNMGMCYYNGRGV PQDHKKAVEWYSKAAGGGNAAAQNRLQVLNSKKGRQ
MMETSP0087_10568|m.20012	Undescribed_Undescribed_Strain D1MMETSP0087	Oscillatoria sp.SIO1A7	25.161	3.93e-10	57	274	KLCIFSRSMRGWNRVHQLLVSRRFASSSKQSFVFSAANFRDPTLPPNLAVKEVPLRLATK ESLQGFGLLVDDPADFTTEGKTFEIVKWPVSGWRQLDPETGDEAGTTEGKFDVHWSGDYF FGKNLAINTANNTYLDGLGAVPEVAVKEDPPAGSYNGGGSIHLWMSDYHPDGGQLFFPEN PIPFVVCLGQNTKGDDITPDDMRAFWIPPGKGVYFHPGTWHNGVYVQRQYSPARFLTRQG RVHARVSASWANEFKTLLKVPLSLTSSETC
MMETSP0057_19913|m.53366	Prorocentrum_minimum_CCMP1329	Symploca sp. SIO3E6	30.556	5.48e-07	13	542	LNSARARPASRAPPAGRFSLARSRLQAMSSLKRPREEELPTRWLDLKLATRENTAKYGYF IDDTVVNPGLGIPFYKTVLEGANYKEATWKDQCCVRTSQIHWREDHTVTWLERHMEMTQG FLVLGSNPGLFVFGEPTHDREDLDEKQRSLPDPSKIEALIVPPGHGIIIKKGTWHDFPVS CGPPVSAFIINTEEVVAALASMAAPAPMDHGDCYKLRLADHFDFKWKFRDPRPFVKQMGL VPRPIAQPAMGLQGYGVDMERQEVRAGWGGSTRVFVVPVVNVEVFVPGCGGPGIQPHLQS TPEIANKGWRDYGNRRGLQRLARTFKALGVPATAVINSEAVQLDQVSAALKESGWELGAH GINNSSGNAKMNRMDEEAAFEKCLGDLEASLGS…
MMETSP0057_19912|m.53362	Prorocentrum_minimum_CCMP1329	Symploca sp. SIO3E6	29.167	7.97e-07	13	547	WFAGILSAKNFTHRIAKAMGSLKRSREGELKLATPGGAHGDAELPTRWLDLKLATRENTA KYGFFIDDTVVNPGLGIPFYKTVLEGANYKEATWKDQCCVRTSQIHWREDHTVTWLERHM EMTQGFLVLGSNPGLFVLGEPTHDREDLDEKHRALPDPQRIEAVIVPPGHGIIIKKGTWH DFPVSCGPPVSAFIINTEEVVAALASMAAPAPMDHGDCYKLRLAEHFDFKWKFRDPRPFV REMGLVSAPIAQPRMGTQGYGVDMERQEVRAGWGGSTKVFVVPVVNVEVFVPGSGGPGIQ PHLQSTPEIANKGWRDYGNRRGLQRLARTFKALGVPATAVINSEAVQLDQVSAALKESGW ELGAHGINNSSGNAKMNRMDEEAAFEKCLGDLE…
MMETSP0057_19911|m.53358	Prorocentrum_minimum_CCMP1329	G. sunshinyii YC6258	28.125	1.83e-07	18	548	WFAGILSAKNFTHRIAKAMGSLKRSREGELKLATPGGAHGDAELPTRWLDLKLATRENTA KYGFFIDDTVVNPGLGIPFYKTVLEGANYKEATWKDQCCVRTSQIHWREDHTVTWLERHM EMTQGFLVLGSNPGLFVLGEPTHDREDLDEKHRALPDPQRIEAVIVPPGHGIIIKKGTWH DFPVSCGPPVSAFIINTEEVVAALASMAAPAPMDHGDCYKLRLAEHFDFKWKFRDPRPFV REMGLVSAPIAQPRMGTQGYGVDMERQEVRAGWGGSTKVFVVPVVNVEVFVPGSGGPGIQ PHLQSTPEIANKGWRDYGNRRGLQRLARTFKALGVPATAVINSEAVQLDQVSAALKESGW ELGAHGINNSSGNAKMNRMDEEAAFEKCLGDLE…
MMETSP0057_19910|m.53354	Prorocentrum_minimum_CCMP1329	Symploca sp. SIO3E6	30.556	5.44e-07	13	543	LNSARARPASRAPPAGRFSLARSRLQAMSSLKRPREEELPTRWLDLKLATRENTAKYGYF IDDTVVNPGLGIPFYKTVLEGANYKEATWKDQCCVRTSQIHWREDHTVTWLERHMEMTQG FLVLGSNPGLFVFGEPTHDREDLDEKQRSLPDPSKIEALIVPPGHGIIIKKGTWHDFPVS CGPPVSAFIINTEEVVAALASMAAPAPMDHGDCYKLRLADHFDFKWKFRDPRPFVKQMGL VPRPIAQPAMGLQGYGVDMERQEVRAGWGGSTRVFVVPVVNVEVFVPGCGGPGIQPHLQS TPEIANKGWRDYGNRRGLQRLARTFKALGVPATAVINSEAVQLDQVSAALKESGWELGAH GINNSSGNAKMNRMDEEAAFEKCLGDLEASLGS…
MMETSP0057_17269|m.46074	Prorocentrum_minimum_CCMP1329	Oscillatoria sp.SIO1A7	31.746	1.35e-07	26	248	RGDHDGFRGEGPAAAAVRLHSGELPRADAAGGPPGAGGPPRAGHRRDSRRPWPYRDGPRC LHGGQRHFRDREVALLGLAPARSRNWRRGWNHRGRFRGPLEGGFLLCGEPCGGHAEQQVP RRARRPAGVRLARGSRGGGSHPPLDERLPPRRRSALLAQAAGAVRGVPGPFRARRRHPDM RAFLVPRGLGVYLHPGTWHNGVYVNPKYTASGPLRFLTRQGRVHARVSASWAAEFGALLR VPLH
MMETSP0057_17268|m.46071	Prorocentrum_minimum_CCMP1329	Oscillatoria sp.SIO1A7	25.373	6.28e-13	81	251	AAATTTASAARAPQQPQFAFTPENFRAPTLPAGLQVREVPRELATDETLAGLGRIVTDPD AFTVGRGTFEIVKWPCSGWRQLDPGTGDEAGTTEGDFEVHWKGDFFYAENLAVATQNNKY LDGLGVPPEFASHAAPEAAEAIHLWMSDYHPDGGQLFWPRQPVPFVVCLGPSARGDDIRP EDMRAFLVPRGLGVYLHPGTWHNGVYVNPKYTASGPLRFLTRQGRVHARVSASWAAEFGA LLRVPLH
MMETSP0056_80261|m.215640	Prorocentrum_minimum_CCMP1329	Oscillatoria sp.SIO1A7	25.373	7.19e-13	83	243	SAARAPQQPQFAFTPENFRAPTLPAGLQVREVPRELATDETLAGLGRIVTDPDAFTVGRG TFEIVKWPCSGWRQLDPGTGDEAGTTEGDFEVHWKGDFFYAENLAVATQNNKYLDGLGVP PEFASHAAPEAAEAIHLWMSDYHPDGGQLFWPRQPVPFVVCLGPSARGDDIRPEDMRAFL VPRGLGVYLHPGTWHNGVYVNPKYTASGPLRFLTRQGRVHARVSASWAAEFGALLRVPLH
MMETSP0056_20322|m.54342	Prorocentrum_minimum_CCMP1329	Symploca sp. SIO3E6	30.556	5.96e-07	13	552	WSLTWFAGILSAKNFTHRIAKAMGSLKRSREGELKLATPGGAHGDAELPTRWLDLKLATR ENTAKYGFFIDDTVVNPGLGIPFYKTVLEGANYKEATWKDQCCVRTSQIHWREDHTVTWL ERHMEMTQGFLVLGSNPGLFVFGEPTHDREDLDEKQRSLPDPSKIEALIVPPGHGIIIKK GTWHDFPVSCGPPVSAFIINTEEVVAALASMAAPAPMDHGDCYKLRLADHFDFKWKFRDP RPFVKQMGLVPRPIAQPAMGLQGYGVDMERQEVRAGWGGSTRVFVVPVVNVEVFVPGCGG PGIQPHLQSTPEIANKGWRDYGNRRGLQRLARTFKALGVPATAVINSEAVQLDQVSAALK ESGWELGAHGINNSSGNAKMNRMDEEAAFEKCL…
MMETSP0056_20321|m.54336	Prorocentrum_minimum_CCMP1329	G. sunshinyii YC6258	31.944	1.71e-07	13	552	WSLTWFAGILSAKNFTHRIAKAMGSLKRSREGELKLATPGGAHGDAELPTRWLDLKLATR ENTAKYGFFIDDTVVNPGLGIPFYKTVLEGANYKEATWKDQCCVRTSQIHWREDHTVTWL ERHMEMTQGFLVLGSNPGLFVLGEPTHDREDLDEKHRALPDPQRIEAVIVPPGHGIIIKK GTWHDFPVSCGPPVSAFIINTEEVVAALASMAAPAPMDHGDCYKLRLAEHFDFKWKFRDP RPFVREMGLVSAPIAQPRMGTQGYGVDMERQEVRAGWGGSTKVFVVPVVNVEVFVPGSGG PGIQPHLQSTPEIANKGWRDYGNRRGLQRLARTFKALGVPATAVINSEAVQLDQVSAALK ESGWELGAHGINNSSGNAKMNRMDEEAAFEKCL…
MMETSP0055_78138|m.203603	Prorocentrum_minimum_CCMP1329	Oscillatoria sp.SIO1A7	25.373	6.94e-13	84	240	RAPQQPQFAFTPENFRAPTLPAGLQVREVPRELATDETLAGLGRIVTDPDAFTVGRGTFE IVKWPCSGWRQLDPGTGDEAGTTEGDFEVHWKGDFFYAENLAVATQNNKYLDGLGVPPEF ASHAAPEAAEAIHLWMSDYHPDGGQLFWPRQPVPFVVCLGPSARGDDIRPEDMRAFLVPR GLGVYLHPGTWHNGVYVNPKYTASGPLRFLTRQGRVHARVSASWAAEFGALLRVPLH
MMETSP0055_51868|m.135046	Prorocentrum_minimum_CCMP1329	Symploca sp. SIO3E6	30.556	5.92e-07	13	548	FWLKQPLNSARARPASRAPPAGRFSLARSRLQAMSSLKRPREEELPTRWLDLKLATRENT AKYGYFIDDTVVNPGLGIPFYKTVLEGANYKEATWKDQCCVRTSQIHWREDHTVTWLERH MEMTQGFLVLGSNPGLFVFGEPTHDREDLDEKQRSLPDPSKIEALIVPPGHGIIIKKGTW HDFPVSCGPPVSAFIINTEEVVAALASMAAPAPMDHGDCYKLRLAEHFDFKWKFRDPRPF VREMGLVSAPIAQPRMGTQGYGVDMERQEVRAGWGGSTKVFVVPVVNVEVFVPGSGGPGI QPHLQSTPEIANKGWRDYGNRRGLQRLARTFKALGVPATAVINSEAVQLDAVSAALKESG WDLGAHGINNSSGNAGMDRRGEEAAFGKCLSDL…
MMETSP0055_51867|m.135043	Prorocentrum_minimum_CCMP1329	Symploca sp. SIO3E6	30.556	5.56e-07	13	550	FWLKQPLNSARARPASRAPPAGRFSLARSRLQAMSSLKRPREEELPTRWLDLKLATRENT AKYGYFIDDTVVNPGLGIPFYKTVLEGANYKEATWKDQCCVRTSQIHWREDHTVTWLERH MEMTQGFLVLGSNPGLFVFGEPTHDREDLDEKQRSLPDPSKIEALIVPPGHGIIIKKGTW HDFPVSCGPPVSAFIINTEEVVAALASMAAPAPMDHGDCYKLRLADHFDFKWKFRDPRPF VKQMGLVPRPIAQPAMGLQGYGVDMERQEVRAGWGGSTRVFVVPVVNVEVFVPGCGGPGI QPHLQSTPEIANKGWRDYGNRRGLQRLARTFKALGVPATAVINSEAVQLDQVSAALKESG WELGAHGINNSSGNAKMNRMDEEAAFEKCLGDL…
MMETSP0053_109897|m.289911	Prorocentrum_minimum_CCMP1329	Symploca sp. SIO3E6	30.556	5.5e-07	13	544	QPLNSARARPASRAPPAGRFSLARSRLQAMSSLKRPREEELPTRWLDLKLATRENTAKYG YFIDDTVVNPGLGIPFYKTVLEGANYKEATWKDQCCVRTSQIHWREDHTVTWLERHMEMT QGFLVLGSNPGLFVFGEPTHDREDLDEKQRSLPDPSKIEALIVPPGHGIIIKKGTWHDFP VSCGPPVSAFIINTEEVVAALASMAAPAPMDHGDCYKLRLAEHFDFKWKFRDPRPFVREM GLVSAPIAQPRMGTQGYGVDMERQEVRAGWGGSTKVFVVPVVNVEVFVPGSGGPGIQPHL QSTPEIANKGWRDYGNRRGLQRLARTFKALGVPATAVINSEAVQLDQVSAALKESGWELG AHGINNSSGNAKMNRMDEEAAFEKCLGDLEASL…
MMETSP0047_57093|m.140064	Chroomonas_mesostigmatica_cf_CCMP1168	Symploca sp. SIO3E6	25.641	2.63e-06	61	117	GGAPQSSRLHDRVSAALSAMGVAHCNELRVCGGVFSIDIAVEGGVAIEVNGPSHYVLDVG ASLVPNTETRFKAHVLQRLGWRVVSLPFLDWEDLKGRPALQRKYLQELLRAAREAA
MMETSP0041_39050|m.75737	Lotharella_globosa_LEX01	Oscillatoria sp.SIO1A7	25	5.7e-06	12	423	MDLIQTMNNQTDADKEEEYGVIVKSNELTGKIDQEMLSIHKYIRDLYATKFPELSELVPH PYEYAQVVKTIGNRTDVSNLDLSEFVSQNVQLTITVTATTTSGKPLPPEVLKQVLEGCDA IIELLNSKKKIYSYVESRMNLIAPNLTAIIGSDIAARILGVAGGLKELSEMPSCNMQVLG VKRNILGGFANSAANMHQGILAETDIMLTTPMDLKQRAIRLLAAKCALAARIDSYMTTSQ SNSAEGVKLREQIVKKIEKWQEPPPPKAKKALPVPMDKPRKRRGGKRYRKQRERMKITEL MKQKNRMVFGKAQITDEYTGQDFGMIGVSGTGQLRVNVEDNQKLKKRLARKTKAQLRRIV PGSTTRKVSGTQSSFAMTPVQGIELVNKNNRAE…
MMETSP0020_14682|m.20161	Dinobryon_sp._UTEXLB2267	Symploca sp. SIO3E6	32.653	5.8e-06	28	167	EVVKTPQEETEEATELLSMPLTDTLIAERAEFGCDADIEVDADFVGVDLPKPHNIETDDN DEVIVQYGRVHRKPVEANRNDIDETSPKEEDDEKKEEKKPKKSGNSQFRMQLEQEEQLLR KTKKGSGMFDEEAEEEEEEGQQAGLGDFGFGVVSKIREDDEEADA
MMETSP0015_52149|m.156532	Odontella_aurita_1302-5	Symploca sp. SIO3E6	34.722	1.4e-06	9	813	MDESSNEMAEEKKSEDIPTPPDHFLEIVLATKENTESVGWLITDDEEVIKKEEEIGIPFY STVSEGANFTHADWKDQACVRQARIEWRDDNRVSWLERHMEMTQGFICVGETPGLFVLGE PTHERVDLTDDQRQFPDFEKMKAYIIPGGCGIIIKKGTWHDFPVSVGPTLTTFIVNTKEV IDALTSMEEPAPMNFGDCYKIRCSDVYDDVTLRFPDPRPFIEKLGLTDTVKRRSIKPKSE RADTSSPSVSKEVKTYGNRVKRVEVGNWGRDRSDSVWVVPVLNVESFDPDAYGPSVQPHL NKVQPEVANRGWRDYGNKRGLSRIRSLLRRHQIPCTAVVSSDLVDVPEVANQLRNFQEED GWEIGAHGANNSNGGHAGLSAEEERTKIATCLD…
MMETSP0013_11447|m.22943	Skeletonema_costatum_1716	Oscillatoria sp.SIO1A7	26.852	1.81e-06	21	536	TEIDFGPGCINNDVSCSCLDFWINFTGLLGLIALMVLMVGSLNHIRRNHYKVFYVAHIIA APLFIIASVLHYNRAIMYMCPSLLYYASQTVPVYVESWFSRRQSKGSRILSVSKIPCPSH QRPNGNVLSIEFEASQDTMKKFQPGSYCTLQIPSLSLVAHPFTVNIVPGHSNRFRILMRQ IGPFTTQLVELLECKGQPEANQYIQDEKKECNAESQYNSTISLPTMHINVYGTSQQMAQL YHHDSALIVAGGIGITPYLSMLTEIASSSRASSTLKSVVLHWICRDAALIRYVHEQYFAA ILEKSNGSDQGGGVSIRIVTHFTGSHDNAYCYNDGLETVSYKLNTCDGTPVKSSAYSVSN TRSLVTFATIFCFGTAAAMCCYTYLQSVEVVST…
MMETSP0009_12227|m.17928	Grammatophora_oceanica_CCMP_410	Oscillatoria sp.SIO1A7	34.615	1.62e-07	15	344	NPMWRQAIELIKRDTGRFTMSIDGIVHENPGGWNSLNVLFGVQGDGSAYWFRKHEDGRVQ LWDPSNNLLGAATTPYIGSEPYDFHLFVSDRAYLTIYLDSMNLGYQEVLEVRRIGVEPGK IRLRSQNTAIKIDYFSLDFRDLEPTLMPSPTPTAASTPMPGPTPTAGPAIYTNEFSGTLD DENWNILRGAWNTEDGYLVQSLVTGKRFLEYVSAPTADFAIEVQGVESTSGGLWNNLEII FGQQDSSNFYYMRRSAQGRVQLRARVNGVESTIVNRMSDAVGPGPHDMMVEVKGNVITGS INGVVAFSESVVEFTAGQLQLMTRSASVKIDSISIDIRD
MMETSP0008_14016|m.24446	Prymnesium parvum, Strain Texoma1	Oscillatoria sp.SIO1A7	33.684	3.03e-12	55	175	HGAHAASNSAVAHGDYVFAWSTRDAALAAAASPAPPSPPSNGSSPSPPSPSSPASADASG RGEHAYLWSEINYHACGSQLFFTPDAAVLLLLALPPPHRAPDDVRPDDFRAFYCPAGLGV NVDAFVWHSPPIATTDGQVVMRTRQARVHSKIYYDPLQEHGVLLQVPLREPSG
MMETSP0119_15247|m.42035	Glenodinium_foliaceum_CCAP_1116/3	G. sunshinyii YC6258	20	1e-06	42	239	MDTLLTLLSYPGLATLAVVALIALIFYKRSLRLLGFVIVPDDSIGTVTKNFVLFGRHKEL PPGRIVALYGEAGLQADTLAPGLHLGLWPWQYQVDLVKFTVVPDDAIGIVEACDGLPLPD GRVLARHVDCDNFQDARAFLAAGERGLQMTVVPPGAWRINTLLFTVRLERMTVIEPGKIG IVEARDGRPLTGGRVIGRTVACDSFQDARAFMAGGGERGPQMSVIPQGKYRINPGL
